# Supplementary material for: [12]aneN3-based multifunctional compounds as fluorescent probes and nucleic acids delivering agents
Source: PubMed Central journal article supplement (PMC6968532; doi:10.1080/10717544.2019.1704943), 2019-12-20
Supplement: IDRD_A_1704943_SM0920.pdf [file IDRD_A_1704943_SM0920.pdf]

## Electronic Supplementary Information (ESI)

### **[12]aneN<sub>3</sub>-based multifunctional compounds as fluorescent probes and nucleic acids delivering agents**

Yong-Guang Gao,<sup>ab\*</sup> Shuyuan Huangfu,<sup>a</sup> Suryaji Patil,<sup>a</sup> Quan Tang,<sup>b</sup> Wan Sun,<sup>b</sup> Yu Li,<sup>a</sup> Zhong-Lin Lu<sup>b\*</sup> and Ai-Rong Qian<sup>a\*</sup>

<sup>a</sup> Lab for Bone Metabolism, Key Lab for Space Biosciences and Biotechnology, School of Life Sciences, Northwestern Polytechnical University, Xi'an, Shaanxi 710072, China

<sup>b</sup> KeyLaboratory of Theoretical and Computational Photochemistry, Ministry of Education, College of Chemistry, Beijing Normal University, Xijiekouwai Street 19, Beijing 100875, China.

\* Corresponding authors, Tel.: +86-29-88460660; [gaoyongguang@nwpu.edu.cn](mailto:gaoyongguang@nwpu.edu.cn) (Y.-G. Gao). Tel.: +86 10 58801804. [luzl@bnu.edu.cn](mailto:luzl@bnu.edu.cn) (Z.-L. Lu); Tel.: +86-29-88491840, [qianair@nwpu.edu.cn](mailto:qianair@nwpu.edu.cn) (A.-R. Qian).

## **Contents**

- 1. Spectroscopic properties of 1a-1e**
- 2. Characterization of 1a-1e/RNA (DNA) complexes**
- 3. Cell uptake of 1a-1e/RNA (DNA) complexes**
- 4. Cytotoxicity**
- 5. Spectroscopic data of compounds**
- 6. Spectra**

## 1. Spectroscopic properties of 1a-1e

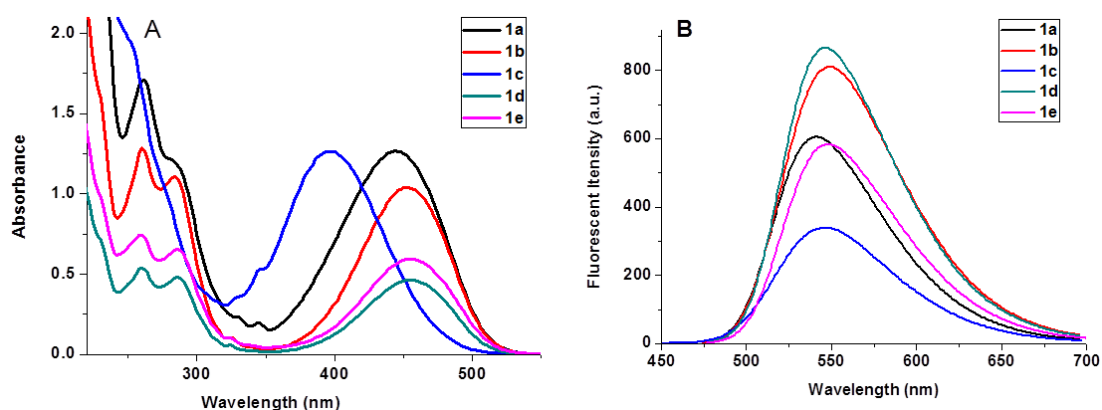

**Fig. S1** The absorption spectra (50  $\mu\text{M}$ ) and fluorescence (10  $\mu\text{M}$ ) spectra of **1a-1e** in water-Tris-HCl buffer (1 mM, pH = 7.2).

**Table S1** The fluorescent intensity changes of **1a-1e** after addition of  $\text{Cu}^{2+}$  ions

| Probes | Fluorescent Intensity ( $F_0$ , before addition of $\text{Cu}^{2+}$ ) | Fluorescent Intensity ( $F$ , after addition of $\text{Cu}^{2+}$ ) | Fluorescent Changes ( $F_0/F$ ) |
|--------|-----------------------------------------------------------------------|--------------------------------------------------------------------|---------------------------------|
| 1a     | 605.86                                                                | 60.91                                                              | 9.95                            |
| 1b     | 810.36                                                                | 17.15                                                              | 47.25                           |
| 1c     | 339.10                                                                | 57.22                                                              | 5.93                            |
| 1d     | 866.29                                                                | 13.60                                                              | 63.69                           |
| 1e     | 582.98                                                                | 39.97                                                              | 14.59                           |

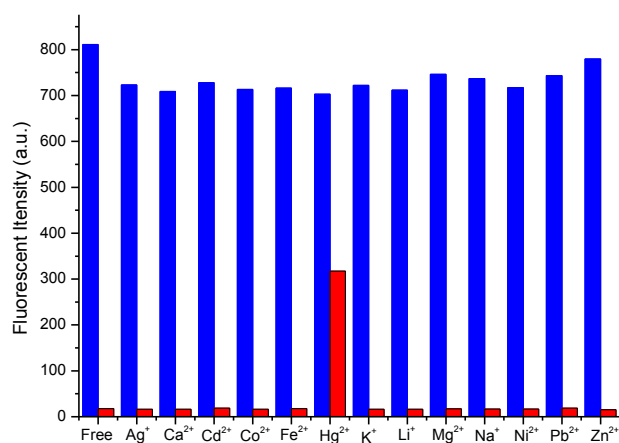

**Fig. S2** Selectivity studies of **1b** with  $\text{Cu}^{2+}$  in the presence of other metal ions. Blue bars represent the addition of the competing metal ion (100  $\mu\text{M}$ ) to the solution of the **1** (10  $\mu\text{M}$ ). Red bars represent the addition of  $\text{Cu}^{2+}$  (30  $\mu\text{M}$ ) to the solution containing other metal ions.

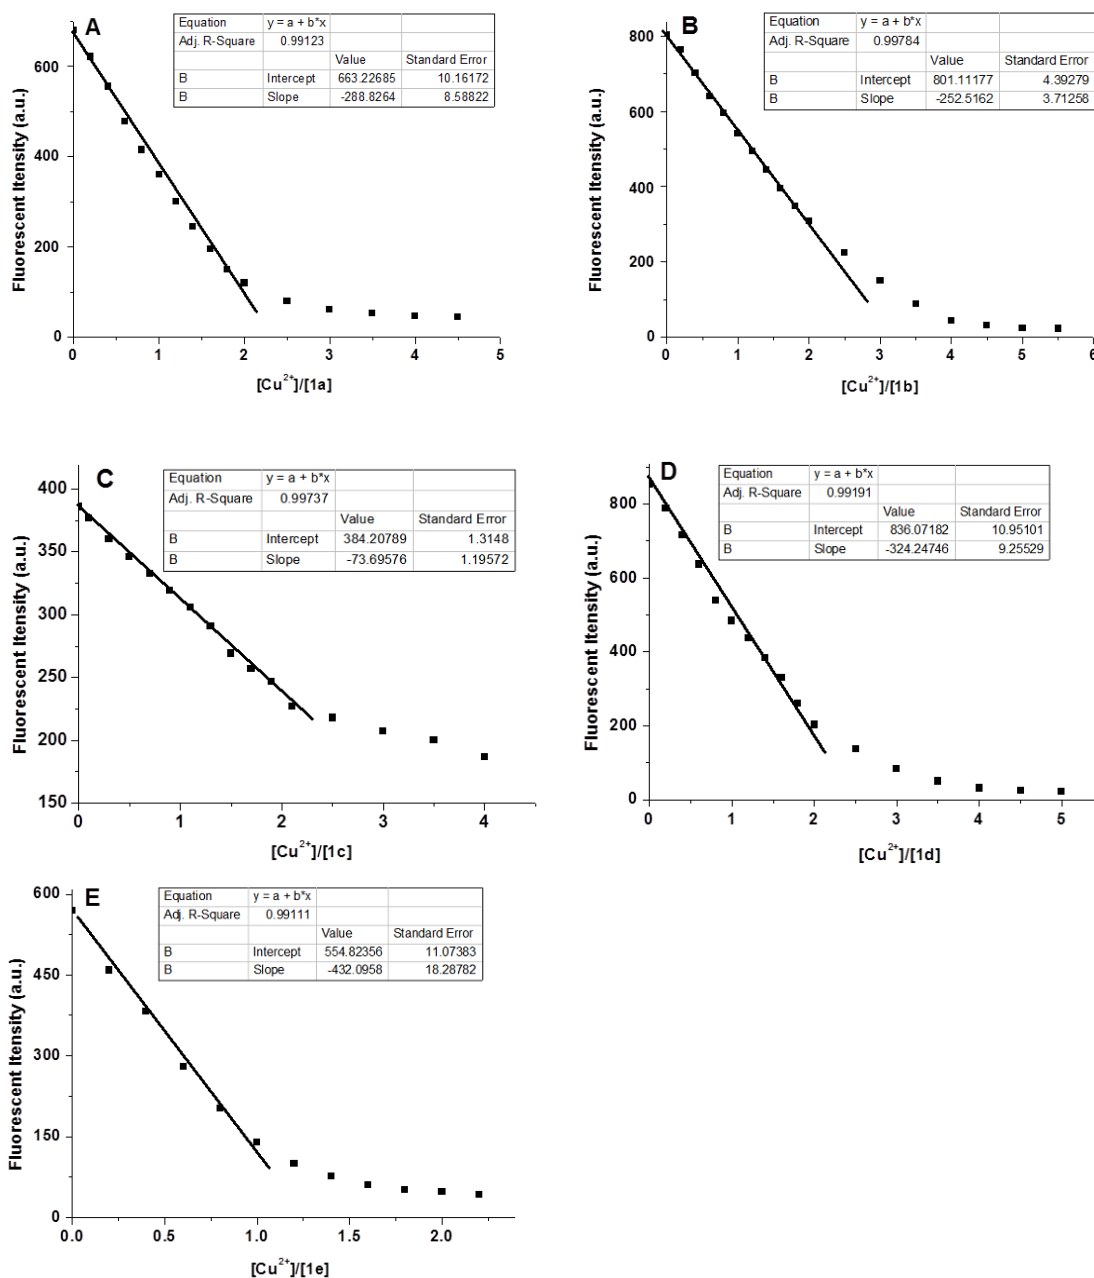

**Fig. S3** Plots of fluorescence intensity of **1a-1e** as a function of  $[Cu^{2+}]/[1]$ . The standard deviations obtained by fluorescence responses of **1a-1e** were determined to be  $\sigma = 1.17, 0.63, 1.08, 0.13$  and  $0.34$  for  $Cu^{2+}$ , therefore, the detection limits were calculated by the formula  $(3\sigma/k)$  and given the results of  $1.21 \times 10^{-8}$  M,  $7.48 \times 10^{-9}$  M,  $4.40 \times 10^{-8}$  M,  $1.23 \times 10^{-9}$  M and  $2.36 \times 10^{-9}$  M, respectively.

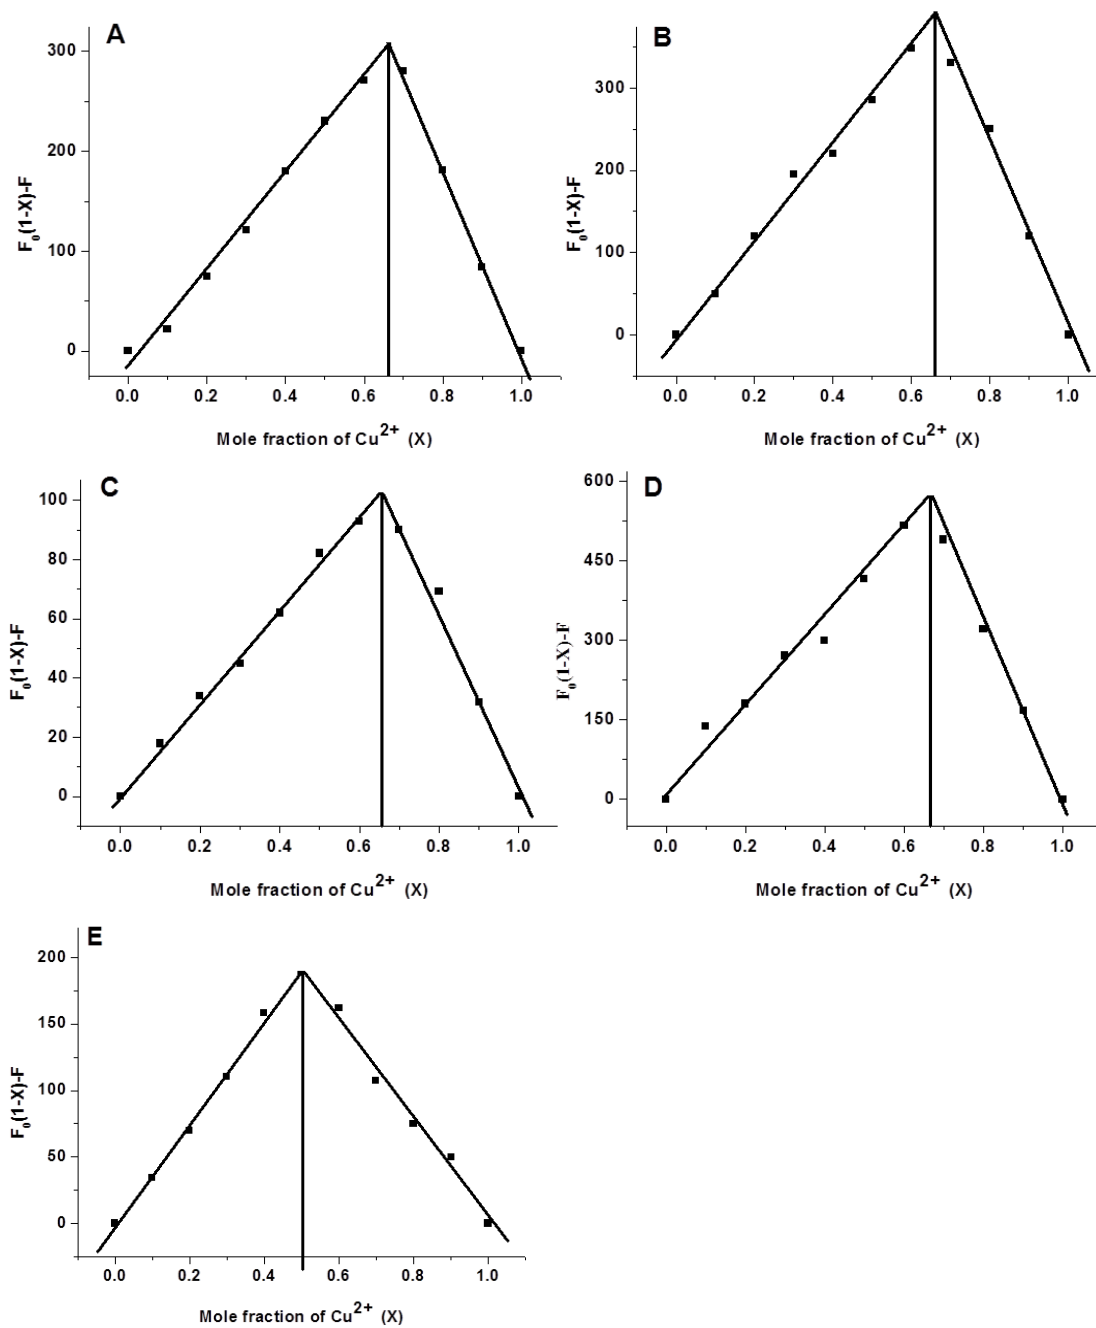

**Fig. S4** Job's plot showing the 1:1 (**1a-1d**/ $\text{Cu}^{2+}$ ) and 1:2 (**1e**/ $\text{Cu}^{2+}$ ) complex stoichiometry, mole fraction of  $\text{Cu}^{2+}$   $X = [\text{Cu}^{2+}]/([\text{Cu}^{2+}] + [\mathbf{1}])$ ,  $[\text{Cu}^{2+}] + [\mathbf{1}] = 30 \mu\text{M}$  in Tris-HCl buffer.

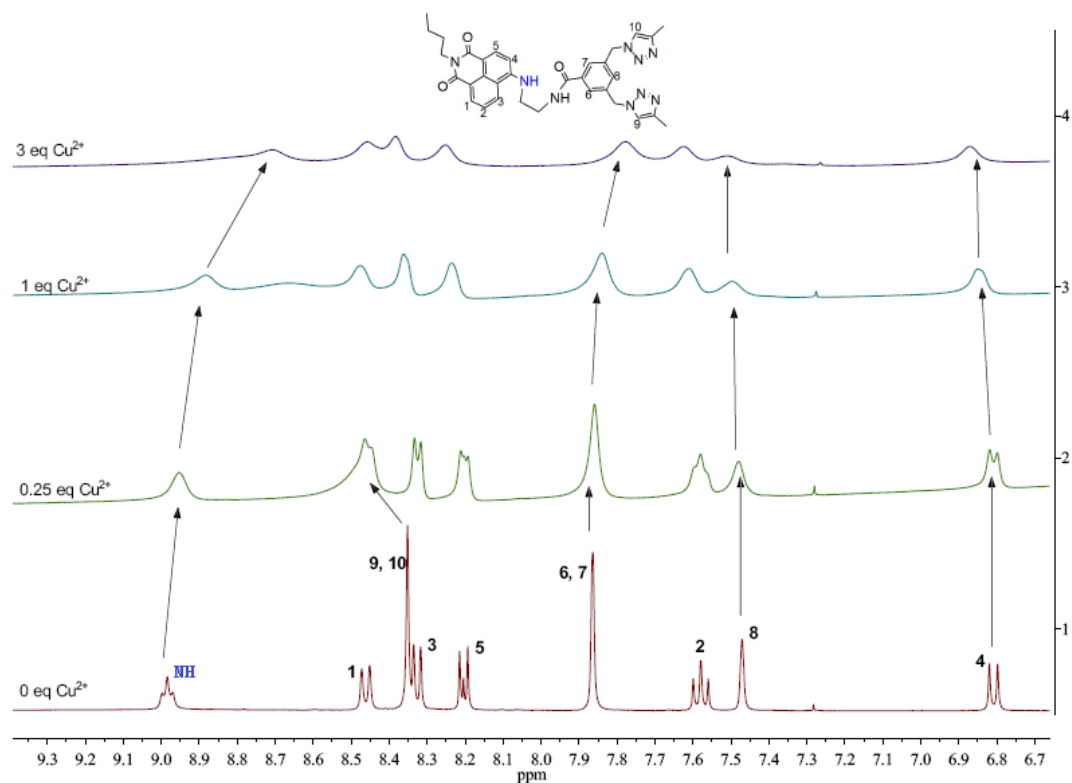

**Fig.S5**  $^1\text{H}$  NMR of compound **1b** upon titration of  $\text{Cu}(\text{ClO}_4)_2 \cdot (\text{CD}_3\text{SOCD}_3)$

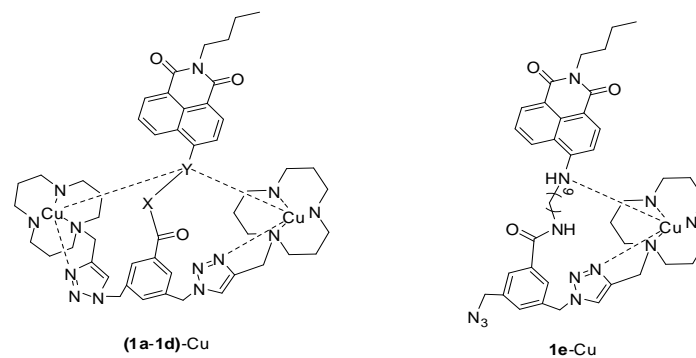

**Fig.S6** The proposed binding modes of **1** and  $\text{Cu}^{2+}$

## 2. Characterization of 1a-1e/RNA (DNA) complexes

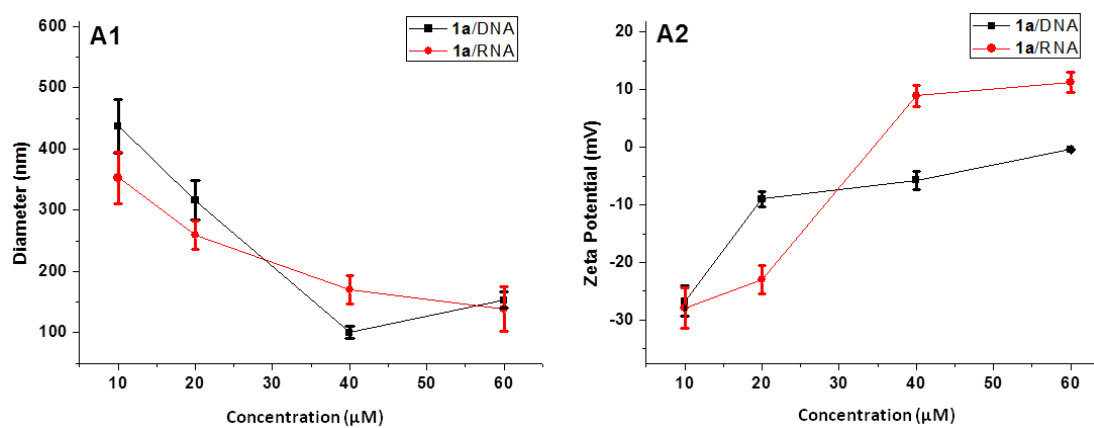

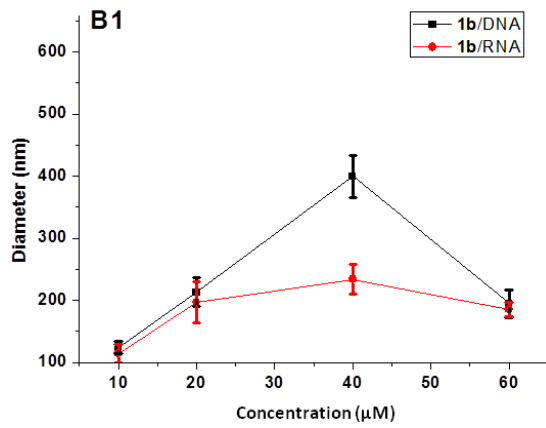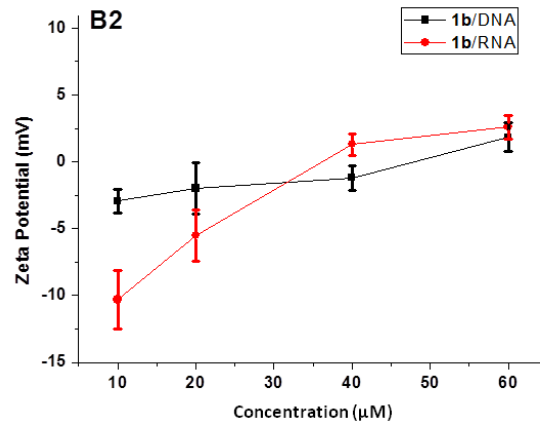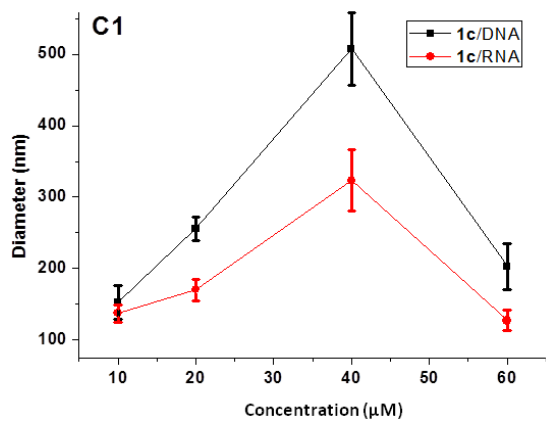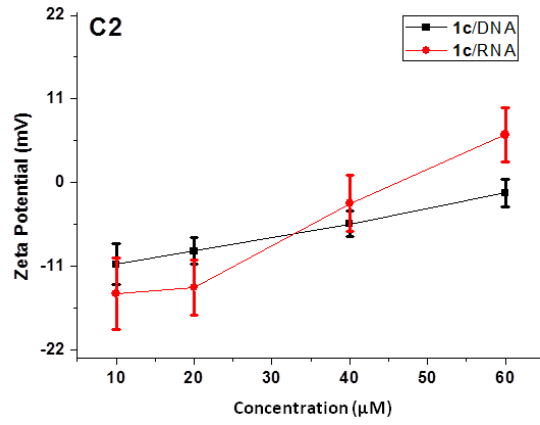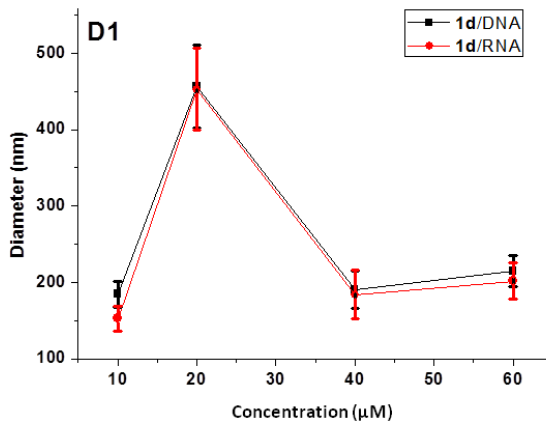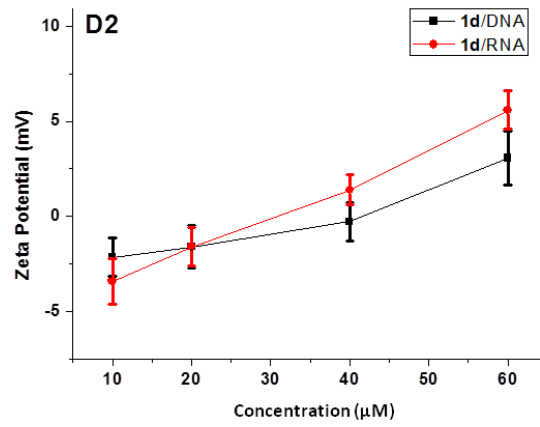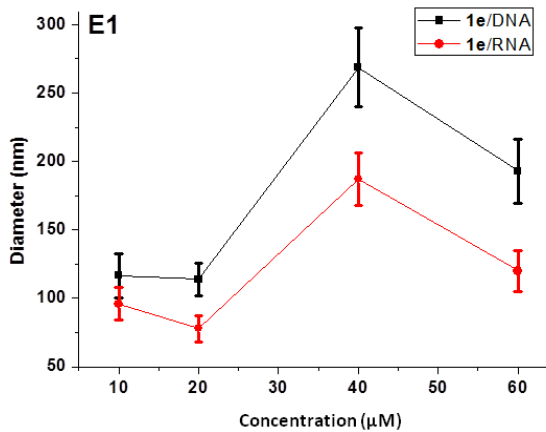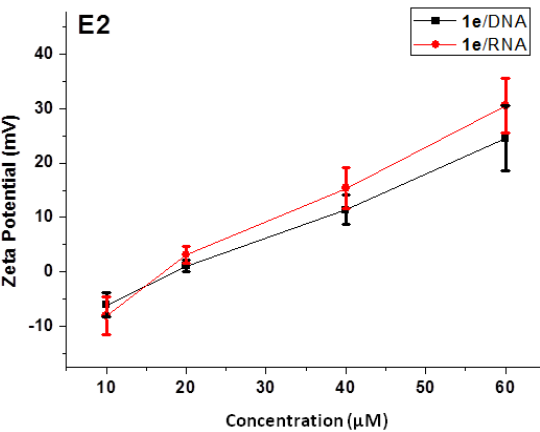

**Fig. S7** (A1-E1) Mean diameter and (A2-E2) zeta potential of **1a-1e**/DNA complexes and **1a-1e**/RNA complexes obtained at various concentrations by DLS.

### 3 Cell uptake of **1a-1e**/RNA (DNA) complexes

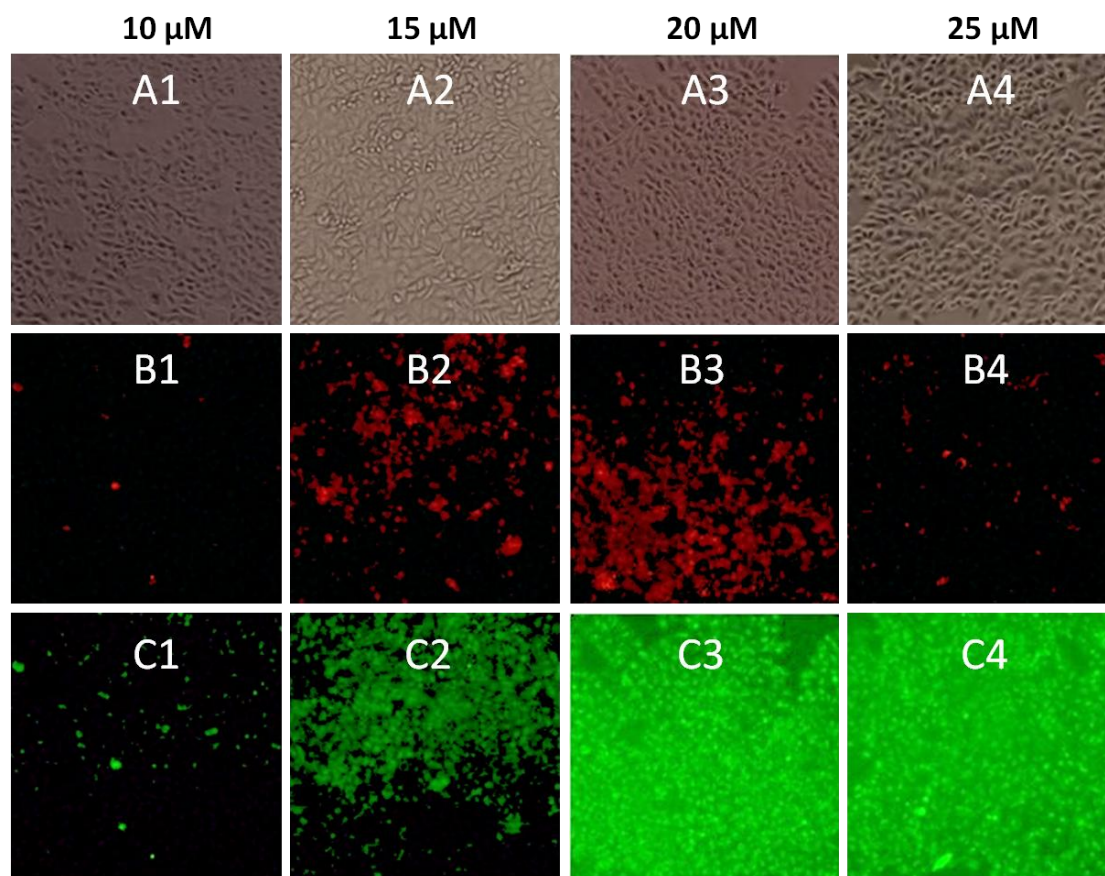

**Fig. S7** Fluorescence microscope images of HeLa cells transfected with Cy5-labeled siRNA (9 µg/mL) by **1b** at different concentrations. A1-A4: BF, B1-B4: red channels, C1-C4: green channels.

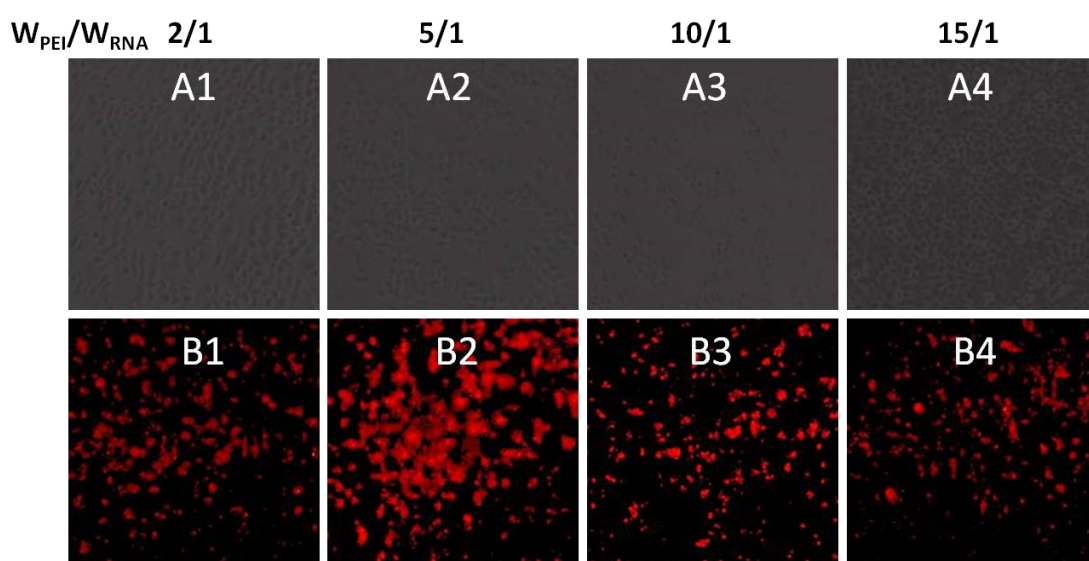

**Fig. S8** Fluorescence microscope images of HeLa cells transfected with Cy5-labeled siRNA (9 µg/mL) by 25 KDa PEI at different weight ratios. A1-A4: BF, B1-B4: red channels.



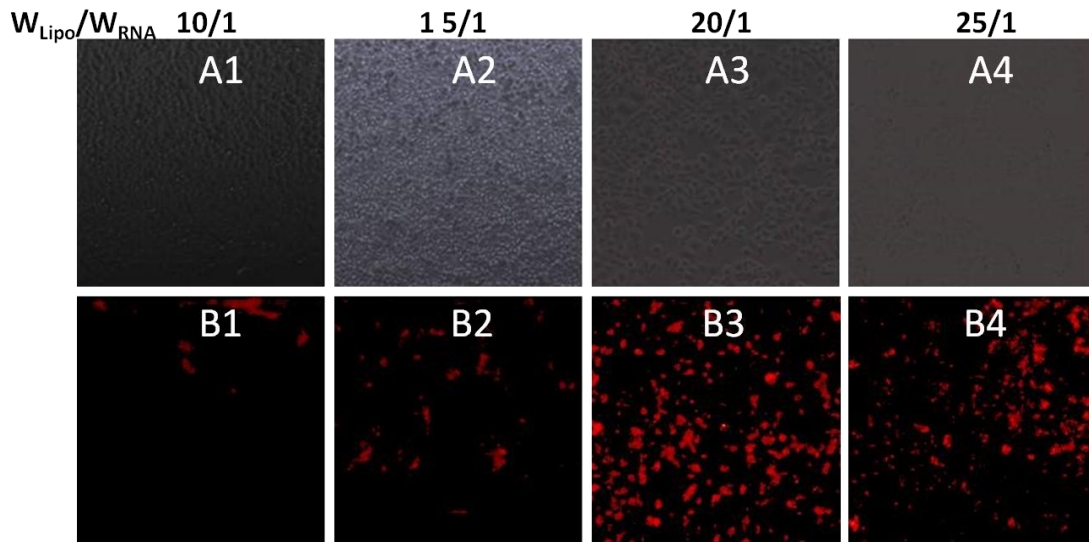

**Fig. S9** Fluorescence microscope images of HeLa cells transfected with Cy5-labeled siRNA (9  $\mu\text{g}/\text{mL}$ ) by lipofectamine 2000 at different weight ratios. A1-A4: BF, B1-B4: red channels.

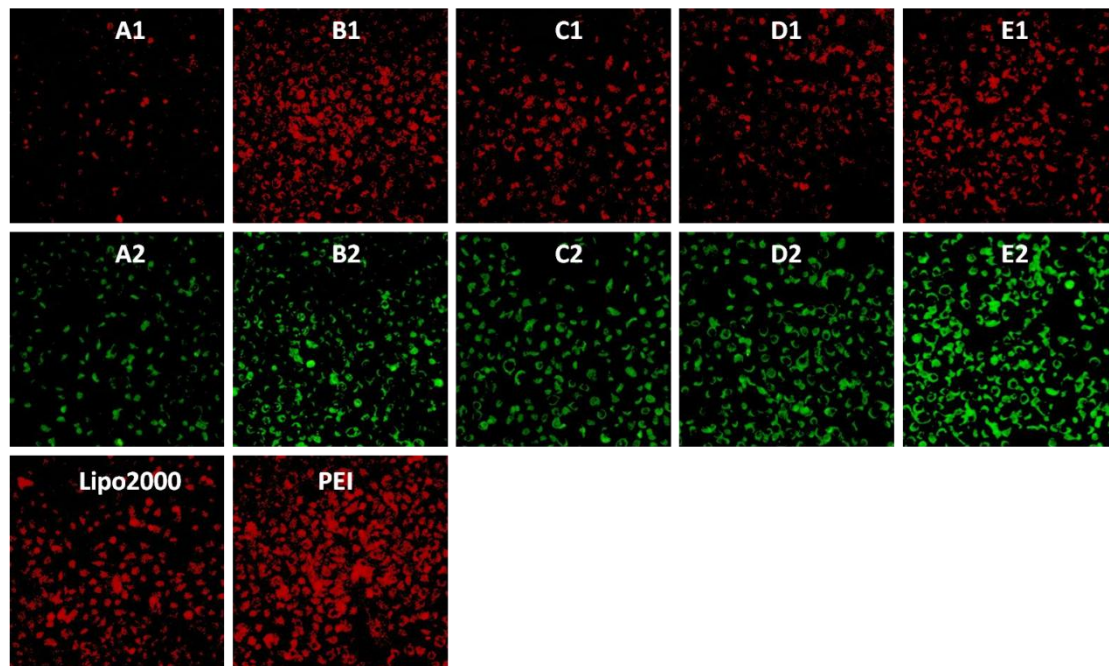

**Fig. S10** Fluorescence microscope images of HepG2 cells transfected with Cy5-labeled siRNA (9  $\mu\text{g}/\text{mL}$ ) by MFCs 1a-1e at the concentration of 20  $\mu\text{M}$ , 25 kD PEI and lipofectamine 2000 as positive control. A1-E1: red channels, A2-E2: green channels.

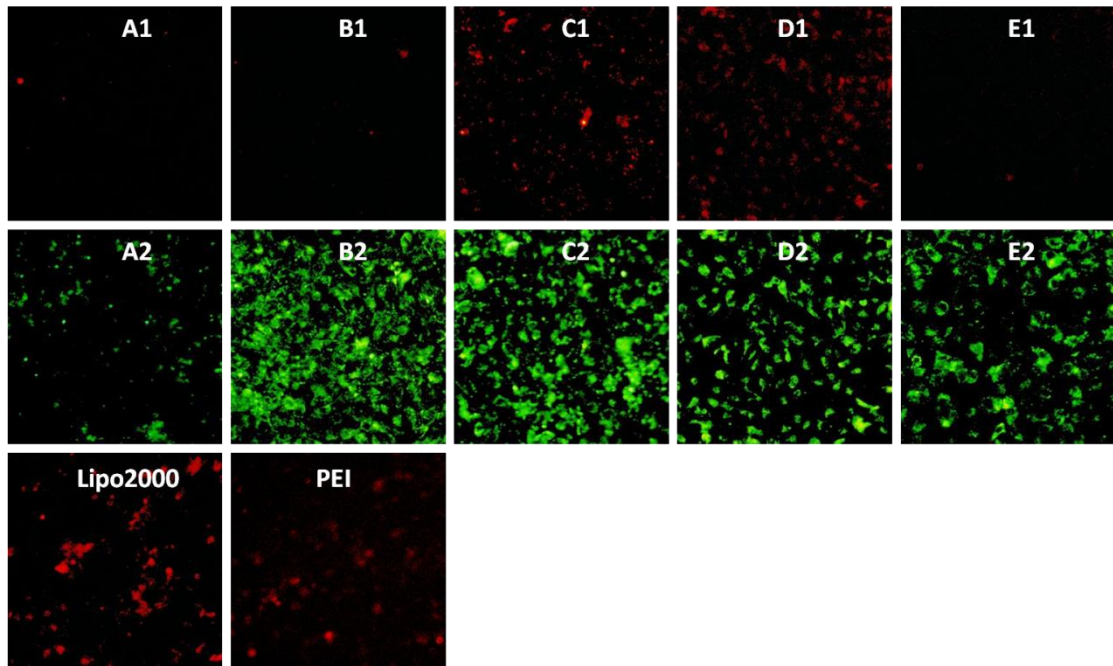

**Fig. S11** Fluorescence microscope images of U2Os cells transfected with Cy5-labeled siRNA (9  $\mu\text{g}/\text{mL}$ ) by MFCs **1a-1e** at the concentration of 20  $\mu\text{M}$ , 25 kD PEI and lipofectamiine 2000 as positive control. A1-E1: red channels, A2-E2: green channels.

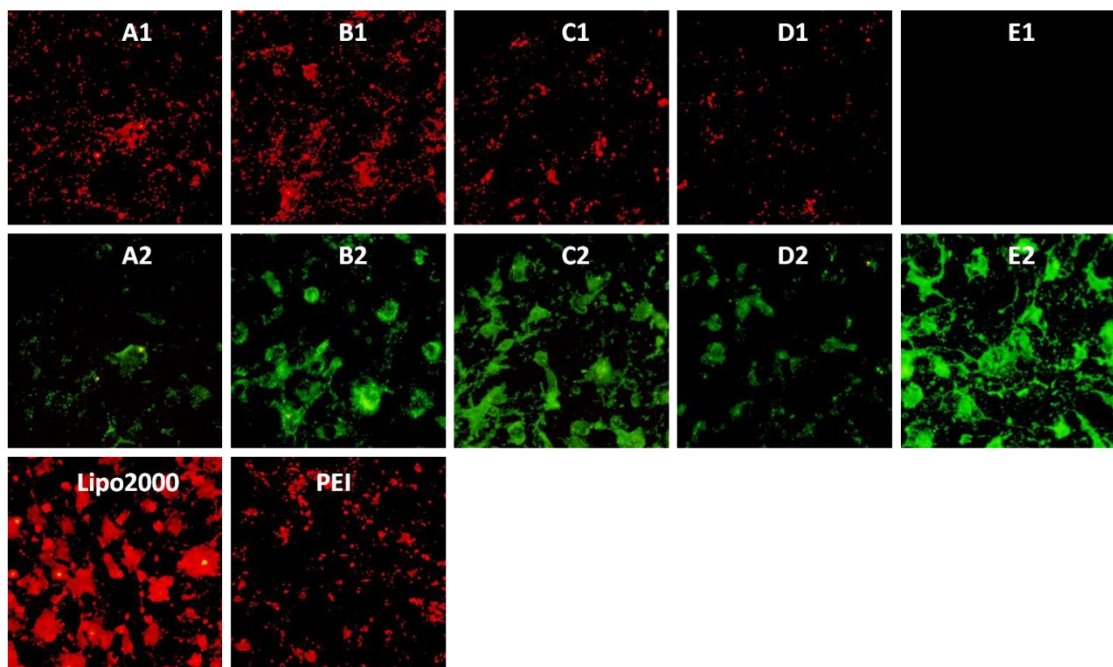

**Fig. S12** Fluorescence microscope images of MC3T3-E1 cells transfected with Cy5-labeled siRNA (9  $\mu\text{g}/\text{mL}$ ) by MFCs **1a-1e** at the concentration of 20  $\mu\text{M}$ , 25 kD PEI and lipofectamiine 2000 as positive control. A1-E1: red channels, A2-E2: green channels.

## 4. Cytotoxicity

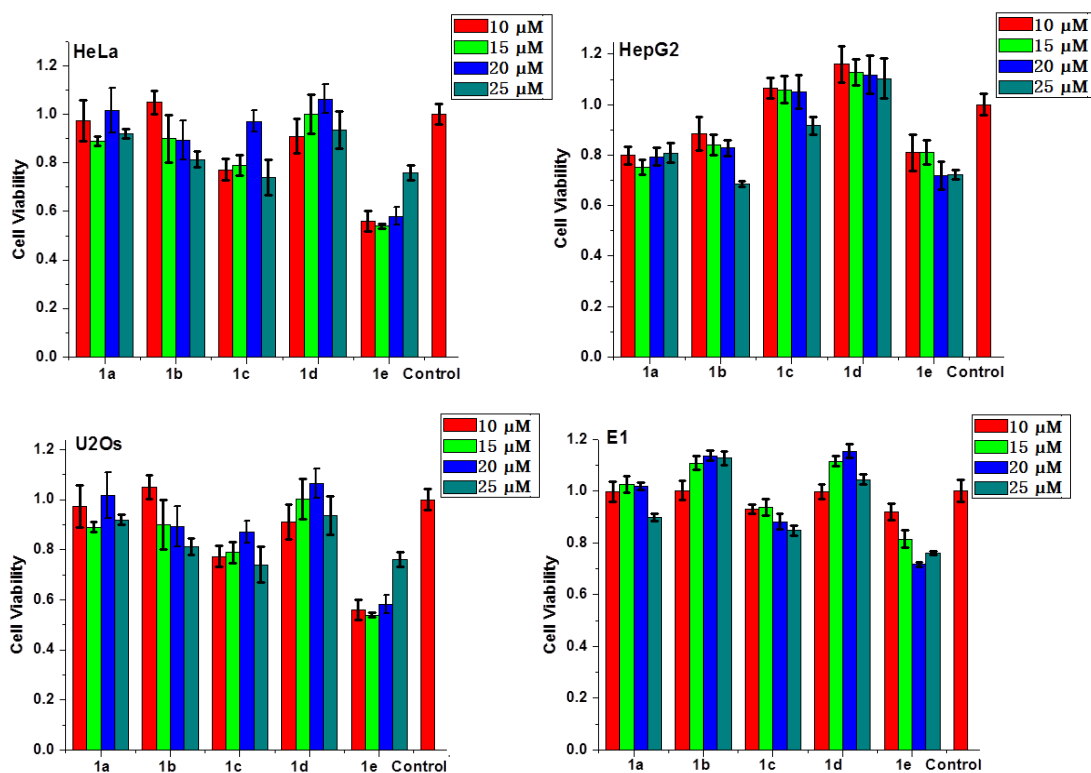

**Fig. S13** Cytotoxicities of the complexes of MFCs **1a-1e**/DNA at different concentrations on HeLa, HepG2, U2Os and MC3T3-E1 cells.

## 5. Spectroscopic data of compounds

**4a:** 59%;  $^1\text{H}$  NMR (400 MHz,  $\text{CDCl}_3$ )  $\delta$  8.59 (d,  $J = 7.2$  Hz, 1H), 8.48 (dd,  $J = 17.1, 8.1$  Hz, 2H), 7.70 (t,  $J = 7.9$  Hz, 1H), 7.38 (s, 2H), 7.28 - 7.09 (m, 4H), 5.45 (s, 4H), 4.15 (t,  $J = 7.2$  Hz, 2H), 3.83 - 3.76 (m, 8H), 3.33 (s, 16H), 3.19 (s, 3H), 2.65 (s, 3H), 2.42 (s, 8H), 1.88 - 1.82 (m, 12H), 1.73 - 1.65 (m, 2H), 1.45 (s, 38H), 0.96 (t,  $J = 7.2$  Hz, 3H);  $^{13}\text{C}$  NMR (101 MHz,  $\text{CDCl}_3$ )  $\delta$  169.68, 164.15, 163.76, 155.96, 143.89, 137.52, 136.45, 132.15, 130.98, 130.44, 129.94, 127.91, 126.38, 125.16, 122.93, 115.55, 114.88, 79.07, 53.01, 49.56, 46.52, 45.30, 43.70, 41.90, 39.85, 37.62, 30.11, 28.36, 27.62, 25.96, 20.22, 13.73; IR (KBr,  $\text{cm}^{-1}$ ): 3338.86, 3127.11, 2967.17, 2931.93, 1690.36, 1649.70, 1581.93, 1416.57, 1359.64, 1245.78, 1169.88, 776.81; EI-MS calcd. For  $\text{C}_{73}\text{H}_{109}\text{N}_{15}\text{O}_{11}$  ( $\text{M}+\text{H}$ ) $^+$ : 1372.8, found 1373.0.

**4b:** 78%;  $^1\text{H}$  NMR (400 MHz,  $\text{CDCl}_3$ )  $\delta$  8.57 (d,  $J = 7.3$  Hz, 1H), 8.41 (d,  $J = 8.4$  Hz, 1H), 8.28 (s, 1H), 7.73 (s, 2H), 7.64 (t,  $J = 7.9$  Hz, 1H), 7.34 (s, 7H), 7.15 (s, 1H), 6.58 (d,  $J = 8.5$  Hz, 1H), 5.52 (s, 4H), 4.19 - 4.12 (m, 2H), 3.89 (s, 2H), 3.70 (s, 4H), 3.55 (s, 2H), 3.30 - 3.24 (m, 16H), 2.39 (s, 8H), 1.90 - 1.66 (m, 14H), 1.42 (d,  $J = 13.1$  Hz, 38H), 0.96 (t,  $J = 7.3$  Hz, 3H);  $^{13}\text{C}$  NMR (101 MHz,  $\text{CDCl}_3$ )  $\delta$  168.55, 164.39, 163.90, 156.20, 149.97, 144.08, 136.55, 135.81, 134.13, 130.72, 130.16, 129.45, 127.07, 124.42, 122.41, 120.11, 109.37, 103.27, 79.25, 53.12, 49.65, 46.87, 45.31, 43.90, 39.73, 39.22, 30.21, 28.38, 25.84, 25.40, 20.29, 13.78; IR (KBr,  $\text{cm}^{-1}$ ): 3379.22, 2967.17, 2923.80, 1684.94, 1646.99, 1584.64, 1413.86, 1362.35, 1248.49, EI-MS calcd. For  $\text{C}_{71}\text{H}_{105}\text{N}_{15}\text{O}_{11}$  ( $\text{M}+\text{H}$ ) $^+$ : 1344.8, found 1344.9.

**4c:** 57%;  $^1\text{H}$  NMR (400 MHz,  $\text{CDCl}_3$ )  $\delta$  8.61 (d,  $J = 7.1$  Hz, 1H), 8.54 (d,  $J = 8.0$  Hz, 1H), 8.40 (d,  $J = 8.4$  Hz, 1H), 7.76 - 7.72 (m, 1H), 7.41 (s, 2H), 7.31 (s, 2H), 7.24 (d,  $J = 4.0$  Hz, 2H), 5.56 (s, 4H), 4.31

(t,  $J = 6.7$  Hz, 1H), 4.20 - 4.15 (m, 2H), 4.07 (s, 1H), 3.79 (s, 4H), 3.31 (s, 18H), 2.44 - 2.42 (m, 8H), 1.88 - 1.83 (m, 12H), 1.73 - 1.67 (m, 4H), 1.44 (s, 38H), 1.28 - 1.21 (m, 2H), 0.98 (d,  $J = 7.3$  Hz, 3H);  $^{13}\text{C}$  NMR (101 MHz,  $\text{D}_2\text{O}$ )  $\delta$  166.26, 165.02, 161.60, 161.15, 153.66, 152.17, 141.72, 134.54, 134.26, 129.71, 129.66, 128.53, 128.27, 127.13, 126.99, 126.19, 125.60, 124.01, 123.59, 120.82, 120.26, 115.24, 112.96, 76.67, 62.88, 50.54, 50.39, 47.10, 44.28, 42.82, 41.33, 37.45, 27.93, 27.61, 25.87, 24.75, 23.46, 17.73, 16.54, 11.21, 11.08; IR (KBr,  $\text{cm}^{-1}$ ): 3343.72, 3127.11, 2969.88, 2926.51, 1690.36, 1657.83, 1590.06, 1416.57, 1365.06, 1229.52, 1161.75, 784.94; EI-MS calcd. For  $\text{C}_{73}\text{H}_{107}\text{N}_{15}\text{O}_{11}$  ( $\text{M}+\text{H}$ ) $^+$ : 1370.8, found 1370.8.

**7d**: 42%;  $^1\text{H}$  NMR (400 MHz,  $\text{CDCl}_3$ )  $\delta$  8.58 (d,  $J = 7.0$  Hz, 1H), 8.45 (d,  $J = 8.0$  Hz, 1H), 8.25 (d,  $J = 8.3$  Hz, 1H), 7.63 - 7.59 (m, 3H), 7.38 (s, 2H), 7.32 (s, 1H), 6.71 (d,  $J = 8.1$  Hz, 1H), 6.61 (s, 1H), 5.76 (s, 1H), 5.52 (s, 4H), 4.16 (s, 2H), 3.74 (s, 4H), 3.58 - 3.10 (m, 20H), 2.41 (s, 8H), 1.87 - 1.39 (m, 60H), 0.97 (t,  $J = 6.8$  Hz, 3H);  $^{13}\text{C}$  NMR (101 MHz,  $\text{CDCl}_3$ )  $\delta$  166.36, 164.64, 164.06, 156.26, 149.89, 136.84, 136.46, 134.41, 130.93, 129.82, 126.77, 124.38, 122.88, 120.33, 109.64, 104.04, 79.31, 53.25, 49.85, 46.97, 45.39, 43.95, 43.28, 39.85, 39.71, 30.28, 29.60, 29.38, 28.53, 27.88, 26.39, 26.29, 26.04, 20.36, 13.83; IR (KBr,  $\text{cm}^{-1}$ ): 3433.43, 2929.22, 1638.86, 1579.22, 1384.04, 1362.35, 1251.20, 1167.17, 1104.82, 641.2; EI-MS calcd. For  $\text{C}_{75}\text{H}_{113}\text{N}_{15}\text{O}_{11}$  ( $\text{M}+\text{H}$ ) $^+$ : 1400.8, found 1400.6.

**7e**: 36%;  $^1\text{H}$  NMR (400 MHz,  $\text{CDCl}_3$ )  $\delta$  8.49 (d,  $J = 6.3$  Hz, 1H), 8.37 (d,  $J = 7.6$  Hz, 1H), 8.17 (d,  $J = 6.9$  Hz, 1H), 7.60 (s, 2H), 7.52 (s, 1H), 7.27 (s, 1H), 7.20 (s, 1H), 6.62 (d,  $J = 8.3$  Hz, 2H), 5.65 (s, 1H), 5.48 (s, 2H), 4.31 (s, 2H), 4.08 (s, 2H), 3.67 (s, 2H), 3.39 - 3.32 (m, 4H), 3.21 - 3.16 (m, 8H), 2.33 (s, 4H), 1.73 (s, 8H), 1.61 (s, 4H), 1.47 (s, 2H), 1.37 (s, 20H), 1.18 (s, 2H), 0.89 (s, 3H);  $^{13}\text{C}$  NMR (101 MHz,  $\text{CDCl}_3$ )  $\delta$  166.61, 164.67, 164.11, 156.30, 149.72, 137.18, 136.56, 136.13, 134.39, 130.97, 129.98, 129.83, 126.41, 126.32, 126.90, 126.41, 126.32, 124.48, 123.02, 120.32, 109.92, 104.12, 79.40, 53.94, 53.48, 49.88, 47.22, 45.42, 44.05, 43.28, 39.90, 39.69, 30.30, 29.63, 29.47, 28.55, 28.45, 26.36, 26.25, 20.39, 13.83; IR (KBr,  $\text{cm}^{-1}$ ): 3438.86, 2926.51, 2099.70, 1638.86, 1579.22, 1549.40, 1384.04, 1359.64, 1248.49, 1164.46, 1115.66, 779.52; EI-MS calcd. For  $\text{C}_{53}\text{H}_{74}\text{N}_{12}\text{O}_7$  ( $\text{M}+\text{H}$ ) $^+$ : 991.5, found 991.3.

## 6. Spectra

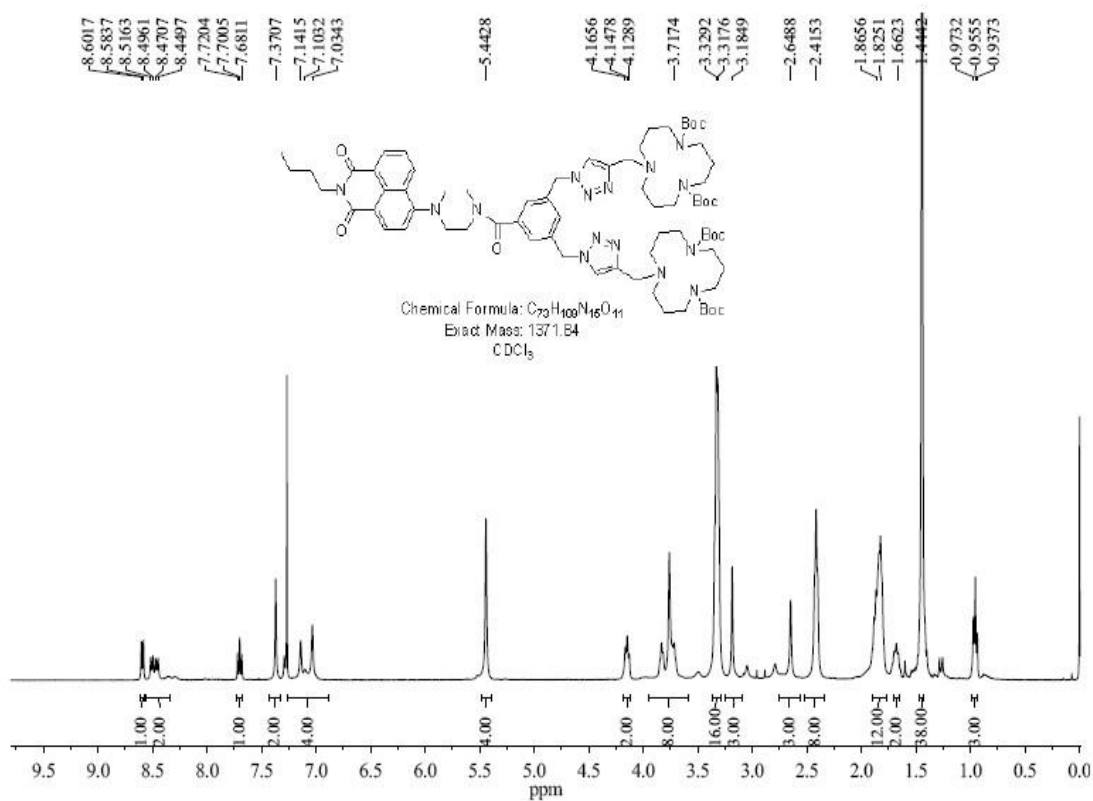

$^1H$  NMR spectrum of compound **4a** (solvent:  $CDCl_3$ )

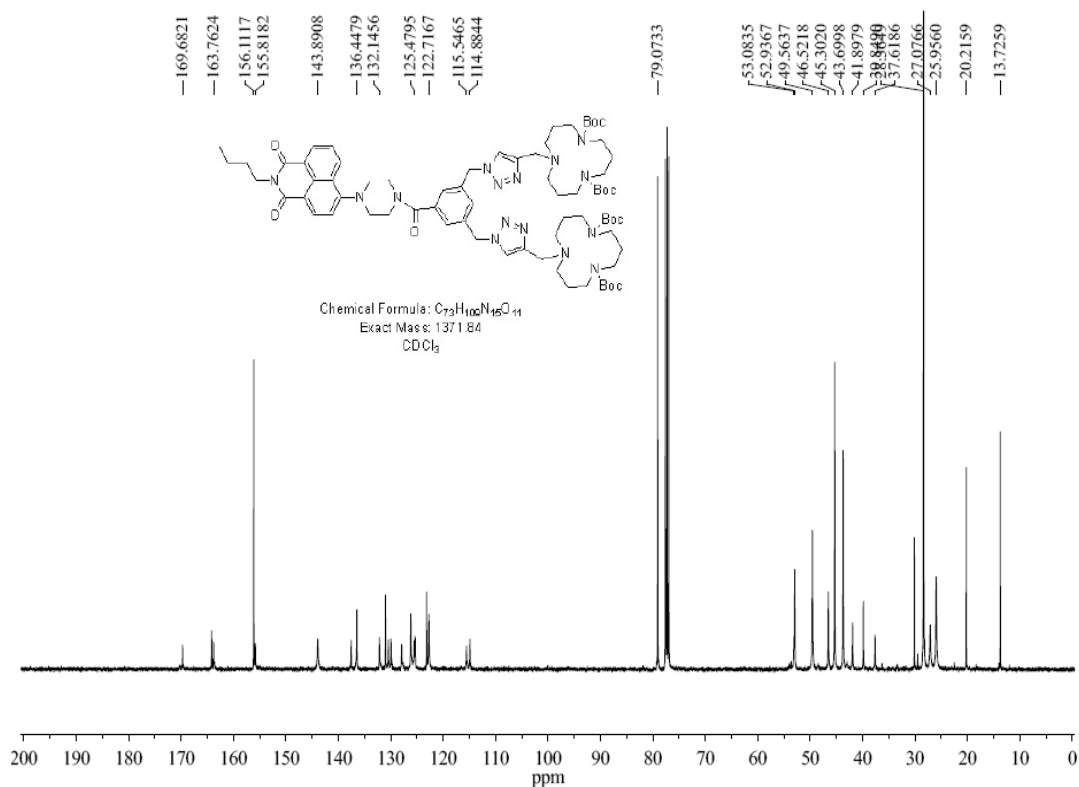

$^{13}C$  NMR spectrum of compound **4a** (solvent:  $CDCl_3$ )

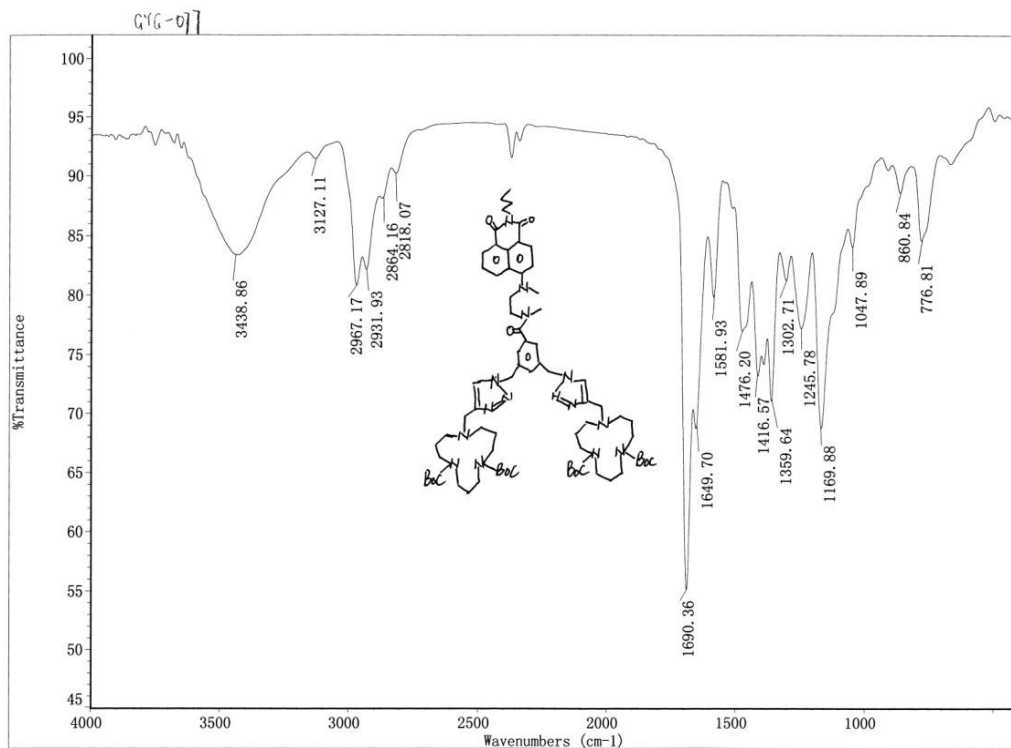

IR spectrum of compound 4a

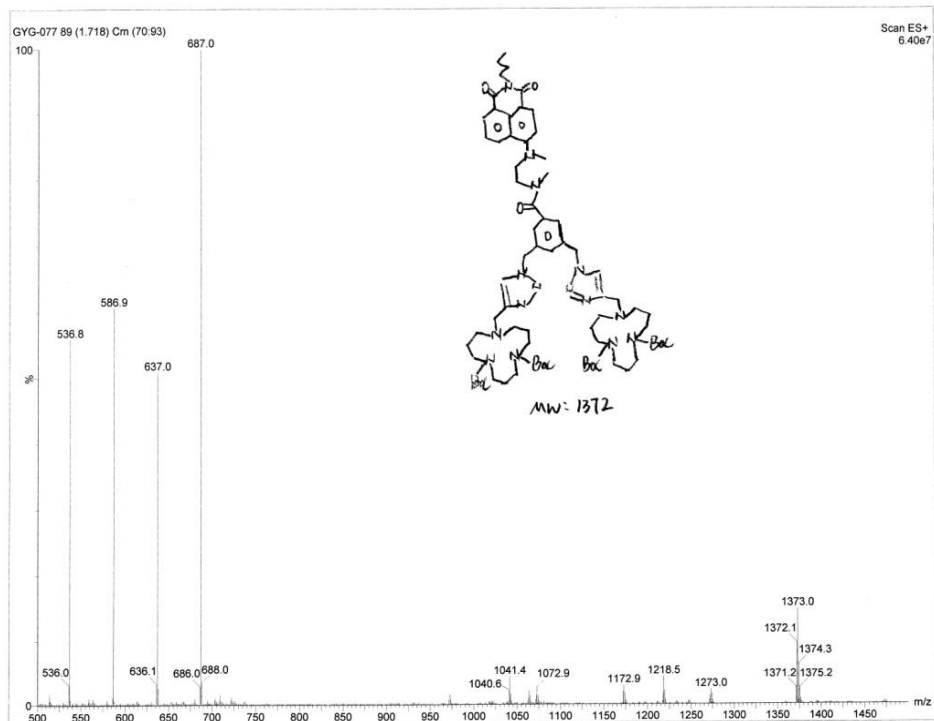

Ms spectrum of compound 4a

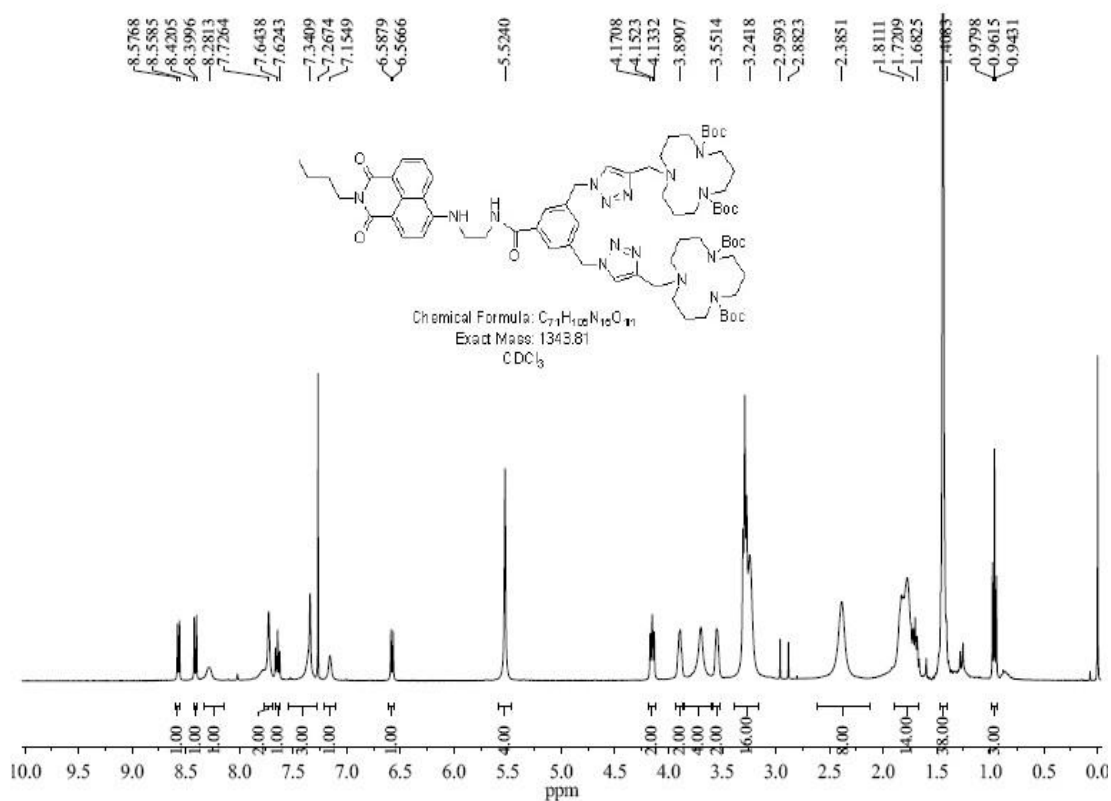

$^1H$  NMR spectrum of compound **4b** (solvent:  $CDCl_3$ )

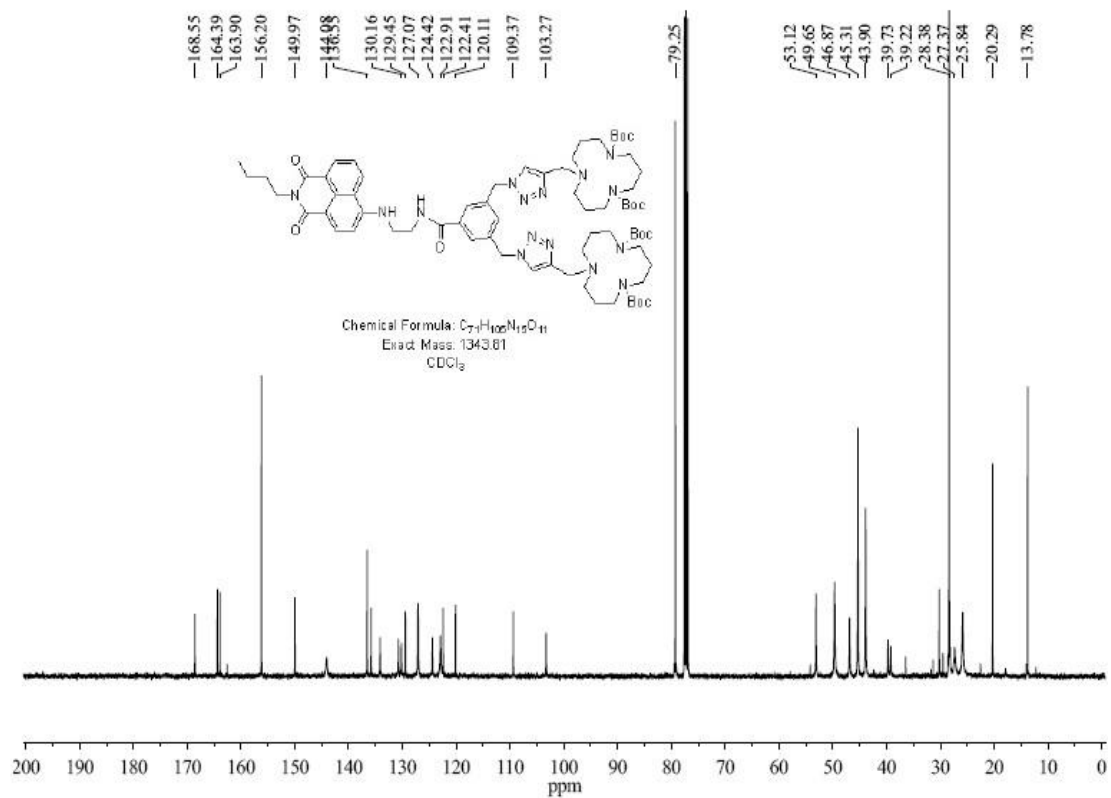

$^{13}C$  NMR spectrum of compound **4b** (solvent:  $CDCl_3$ )

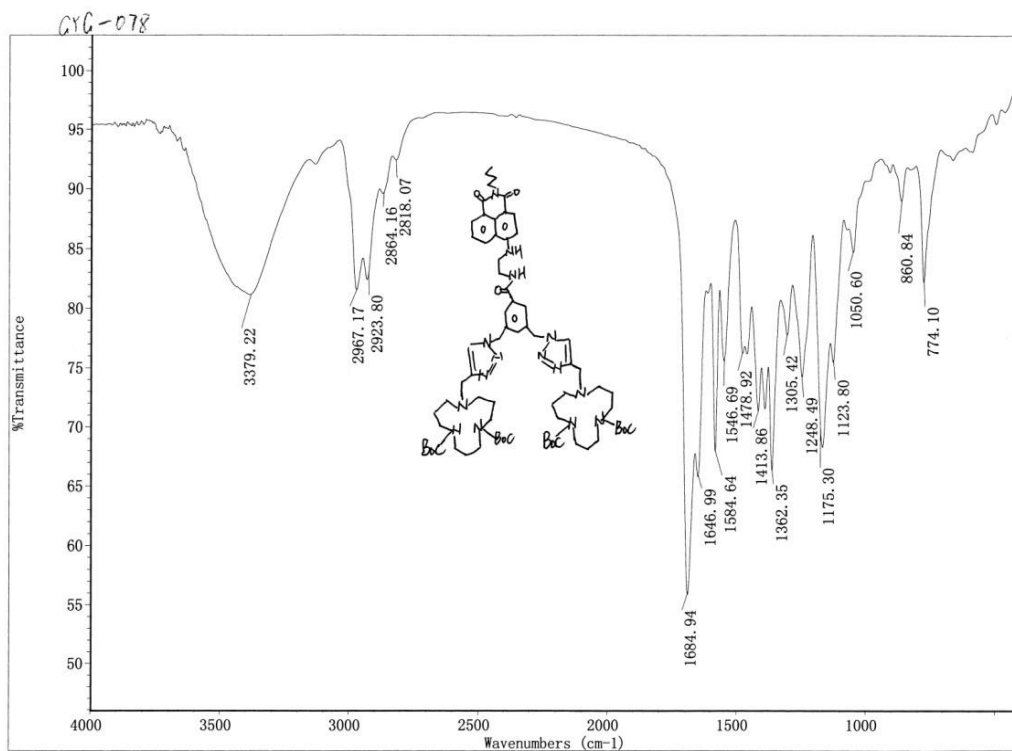

IR spectrum of compound **4b**

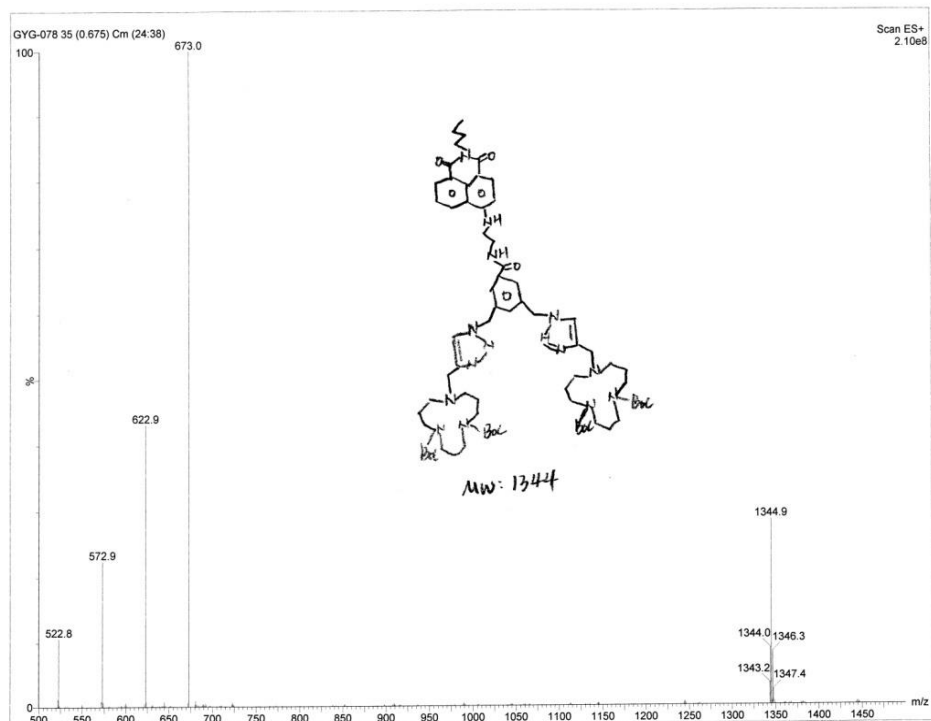

Ms spectrum of compound **4b** (solvent: CDCl<sub>3</sub>)



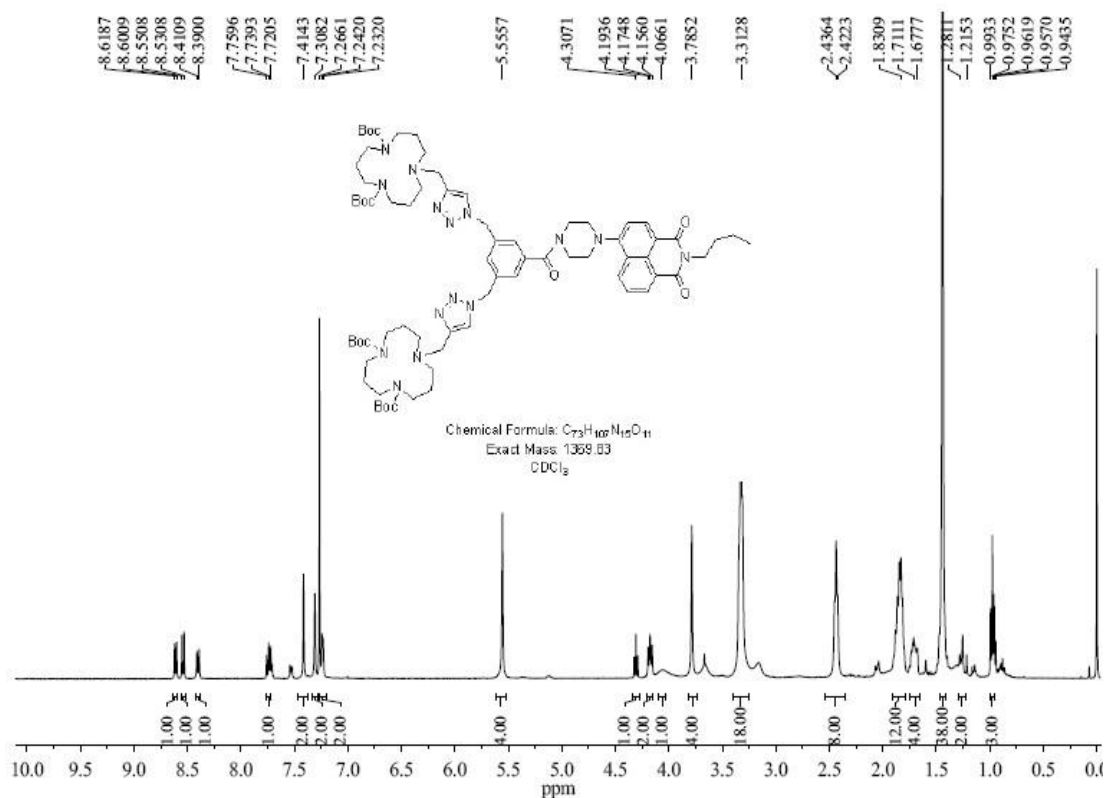

$^1H$  NMR spectrum of compound **4c** (solvent:  $CDCl_3$ )

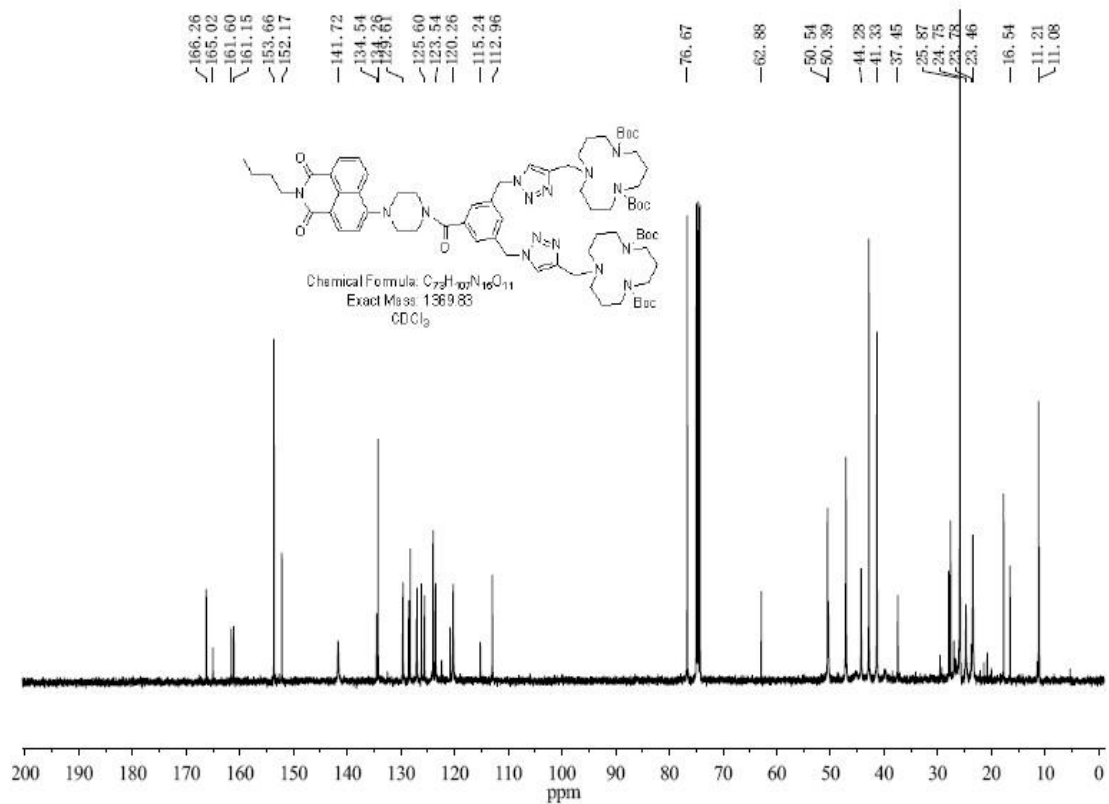

$^{13}C$  NMR spectrum of compound **4c** (solvent:  $CDCl_3$ )

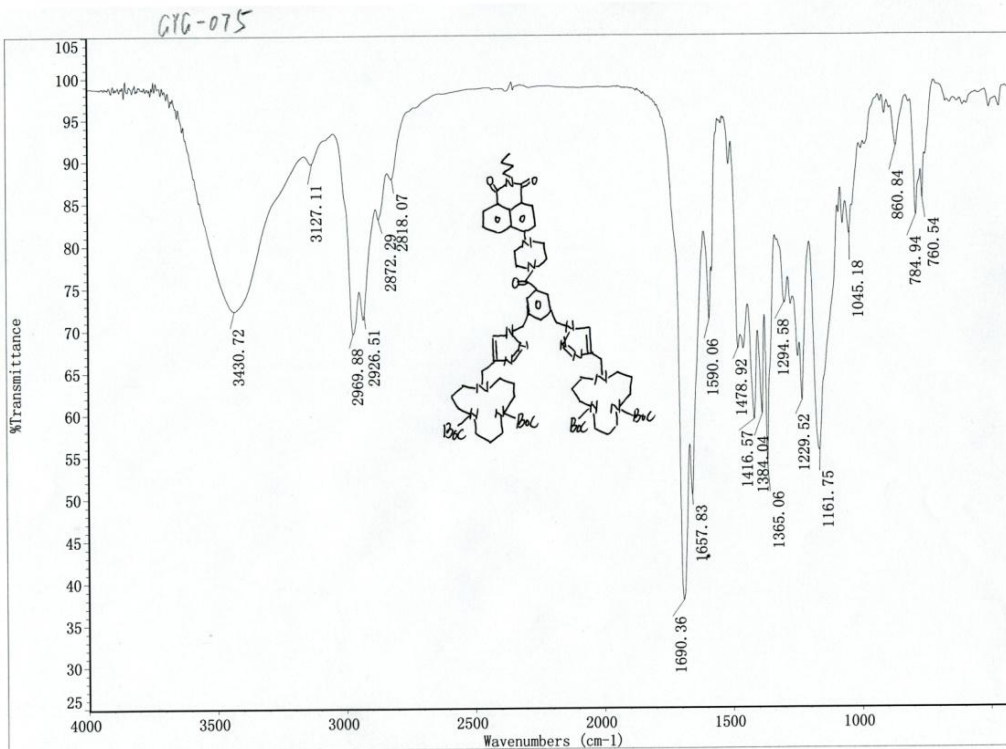

IR spectrum of compound 4c

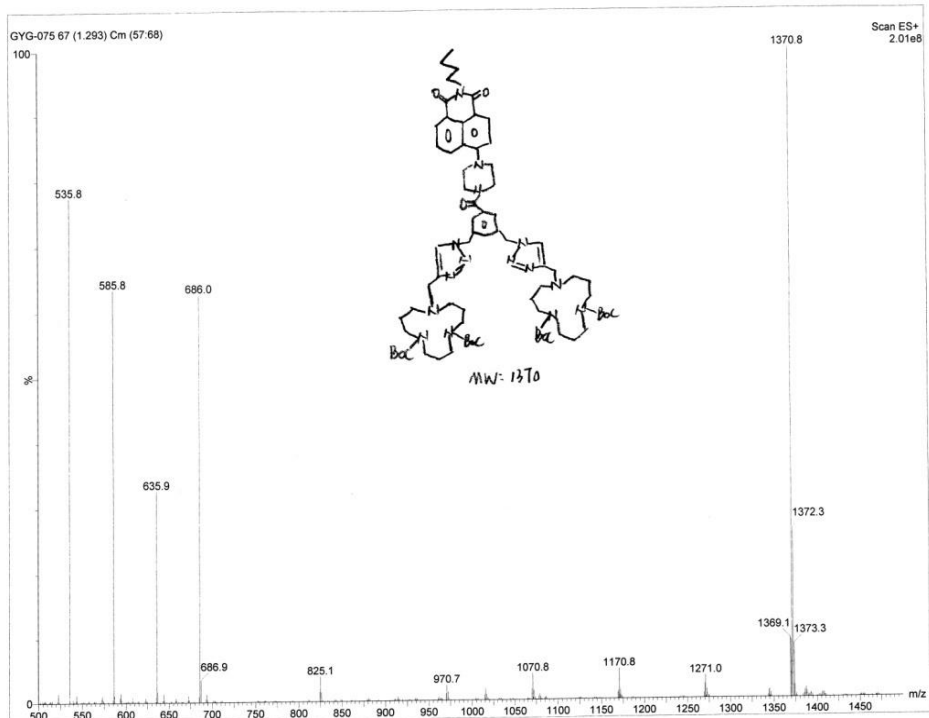

Ms spectrum of compound 4c

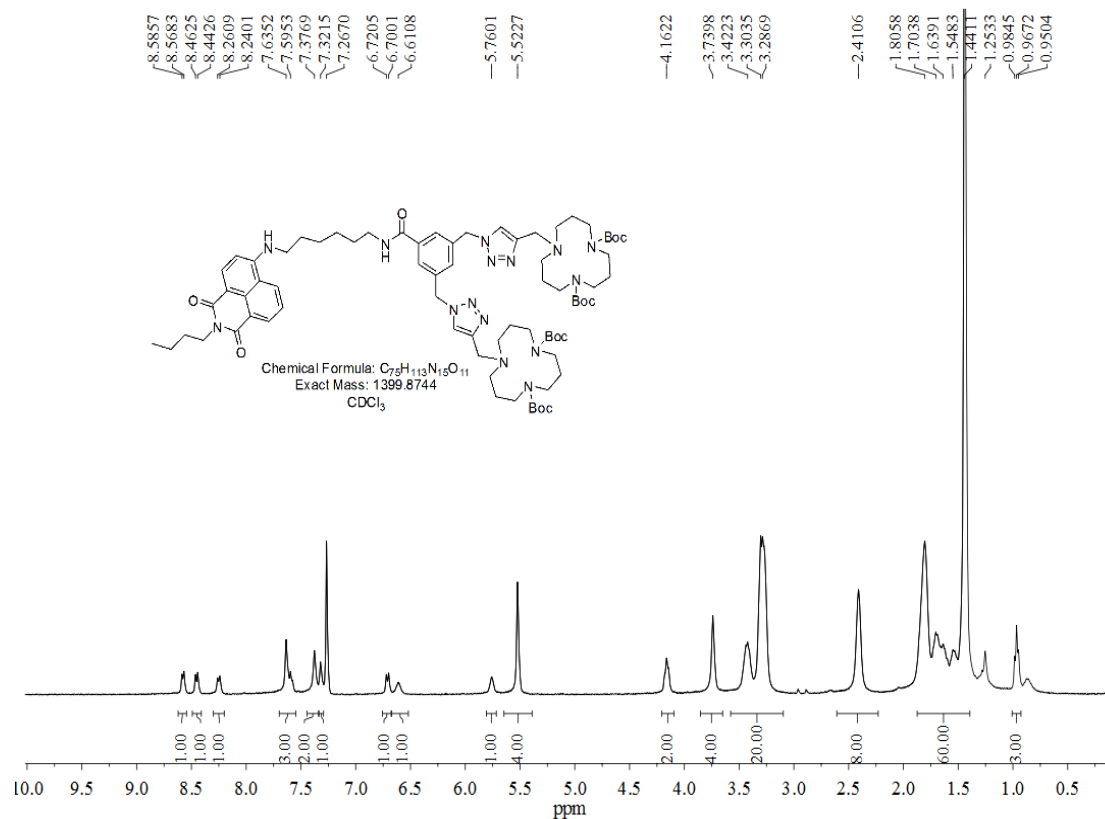

$^1H$  NMR spectrum of compound **7d** (solvent:  $CDCl_3$ )

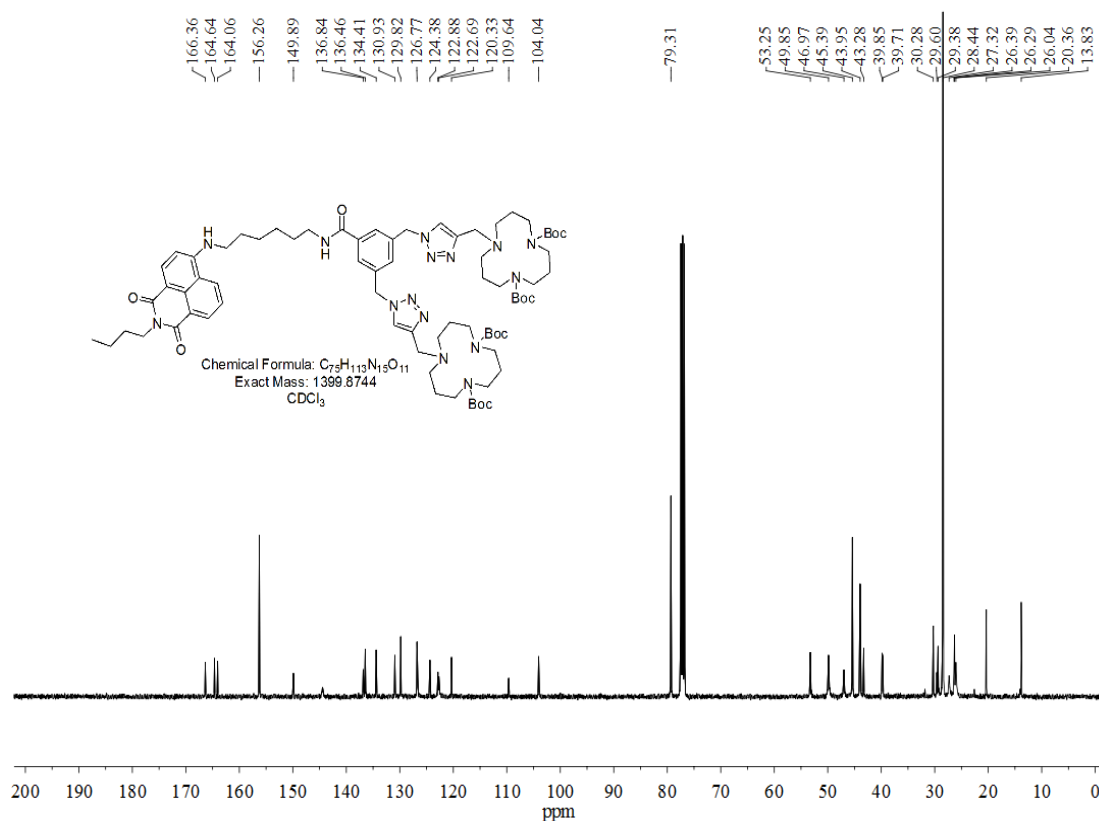

$^{13}C$  NMR spectrum of compound **7d** (solvent:  $CDCl_3$ )

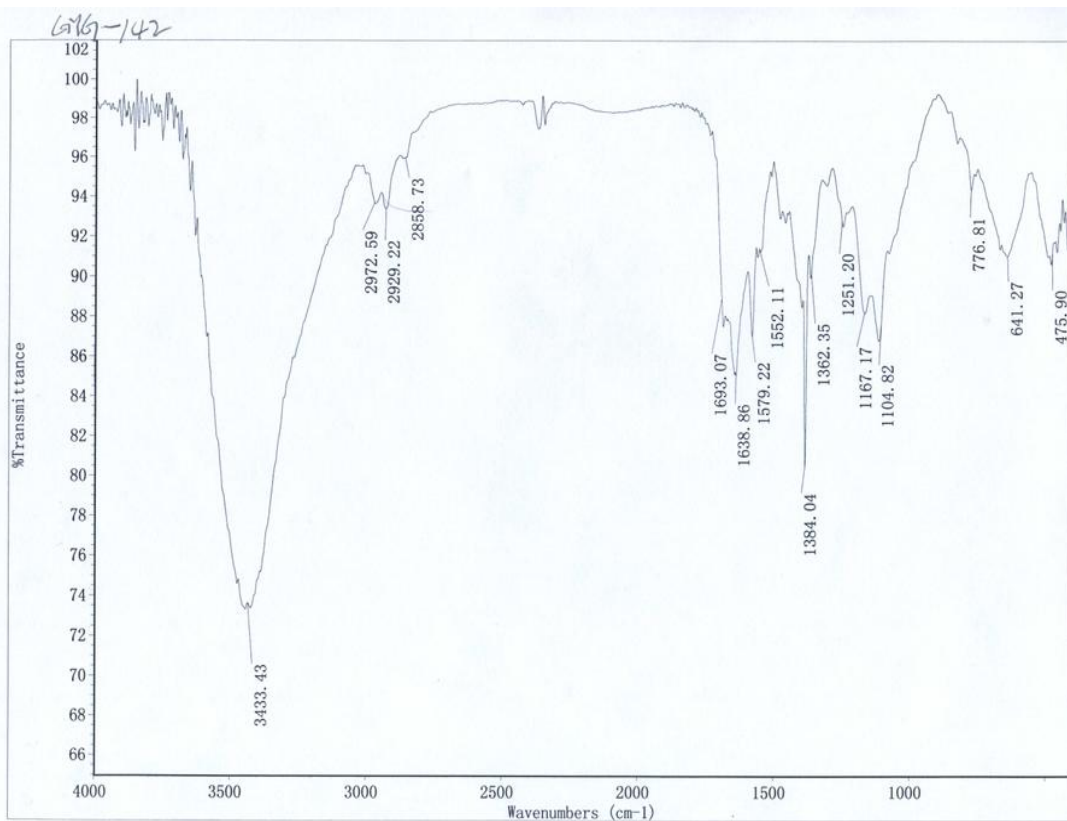

IR spectrum of compound **7d** (solvent: CDCl<sub>3</sub>)

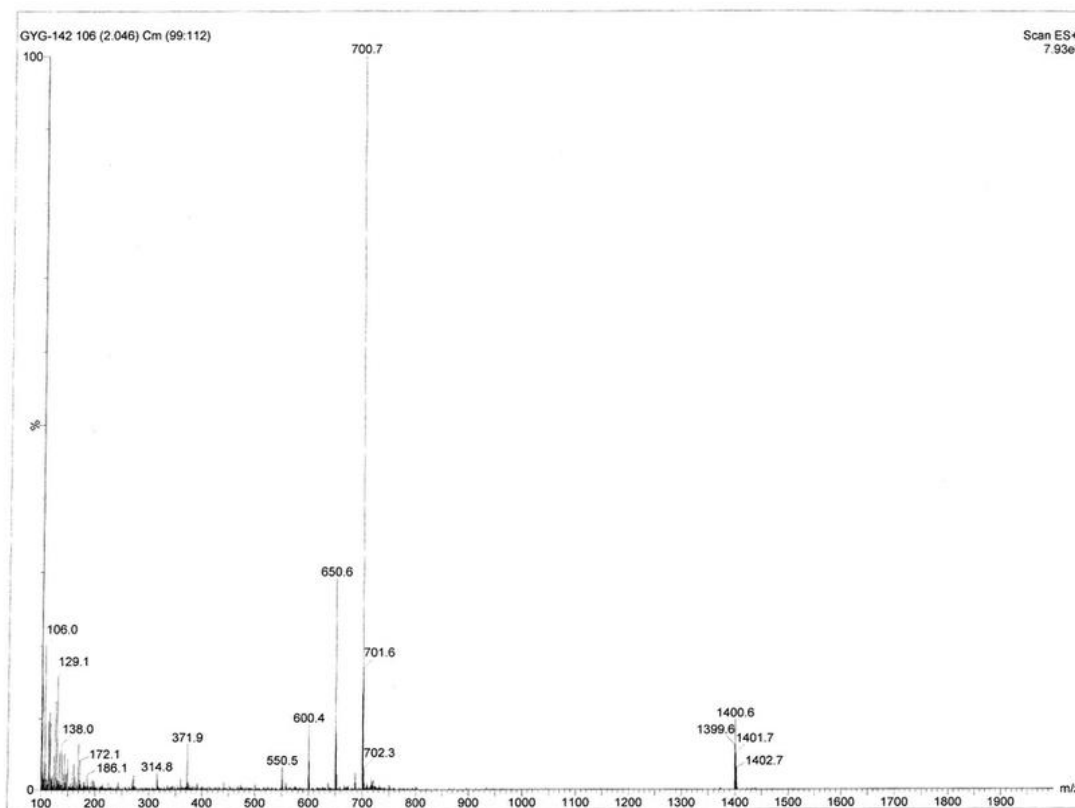

Ms spectrum of compound **7d** (solvent: CDCl<sub>3</sub>)

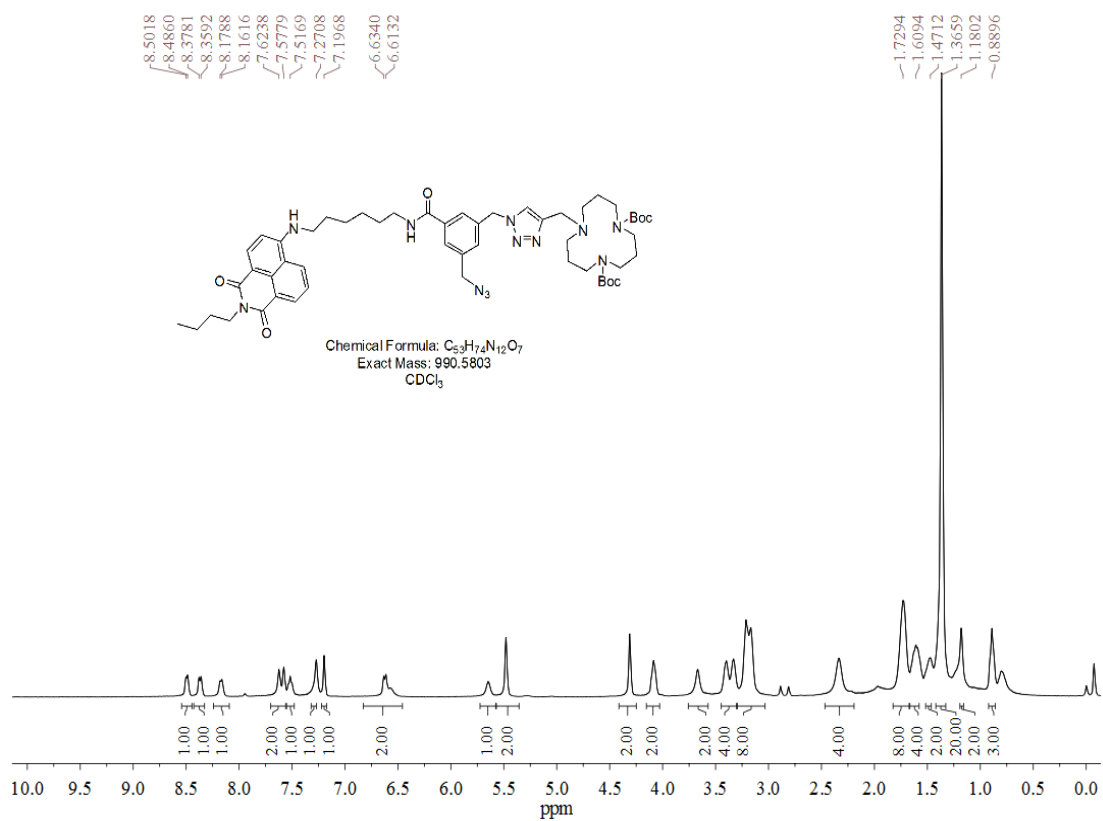

$^1H$  NMR spectrum of compound **7e** (solvent:  $CDCl_3$ )

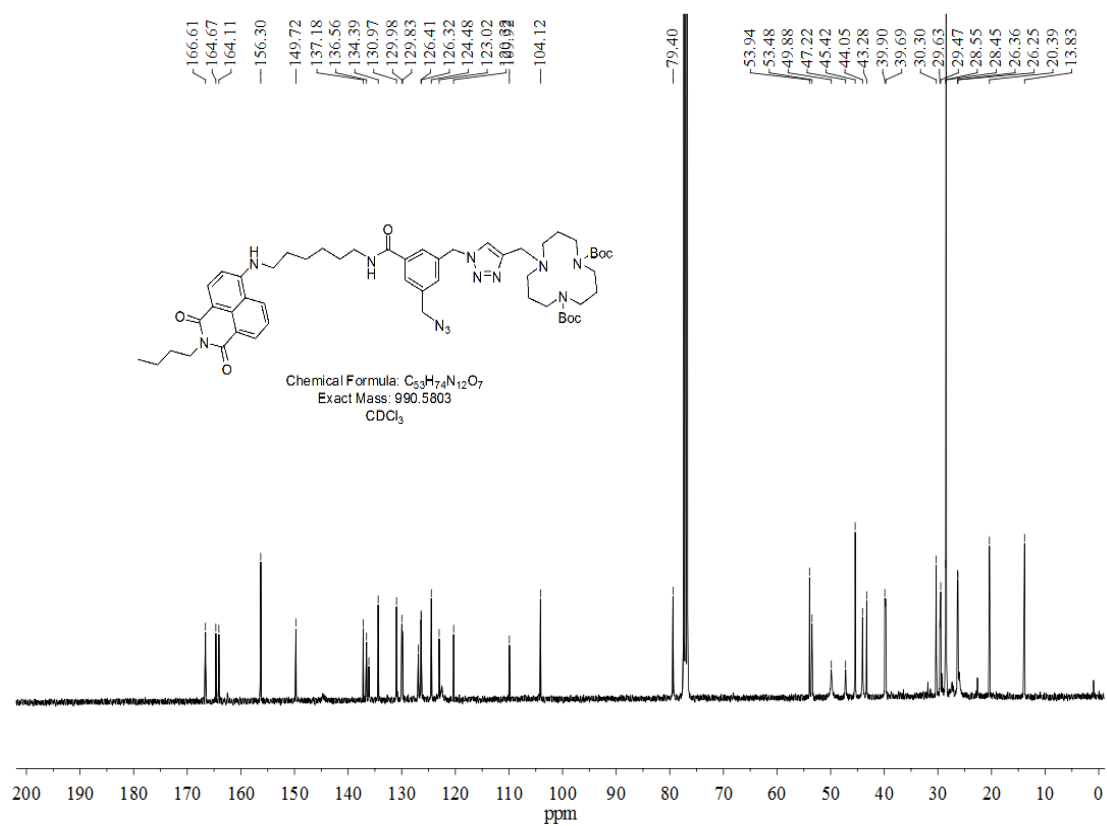

$^{13}C$  NMR spectrum of compound **7e** (solvent:  $CDCl_3$ )

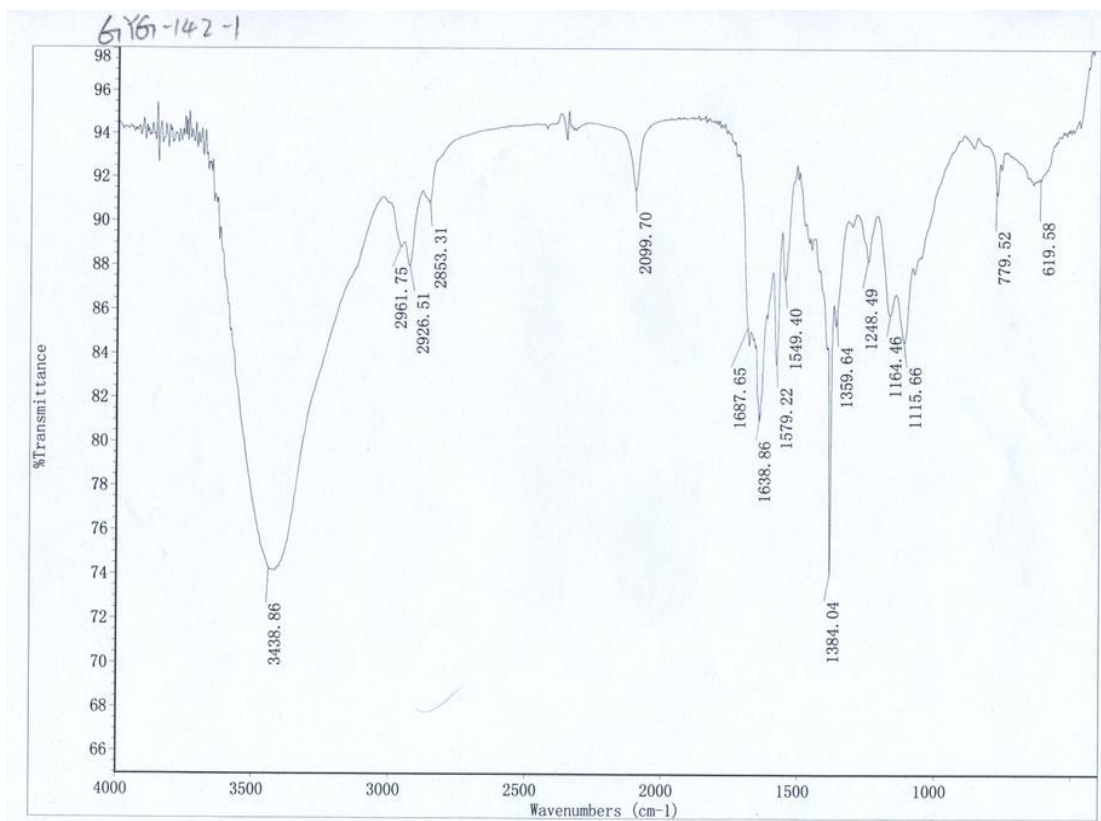

IR spectrum of compound **7e** (solvent: CDCl<sub>3</sub>)

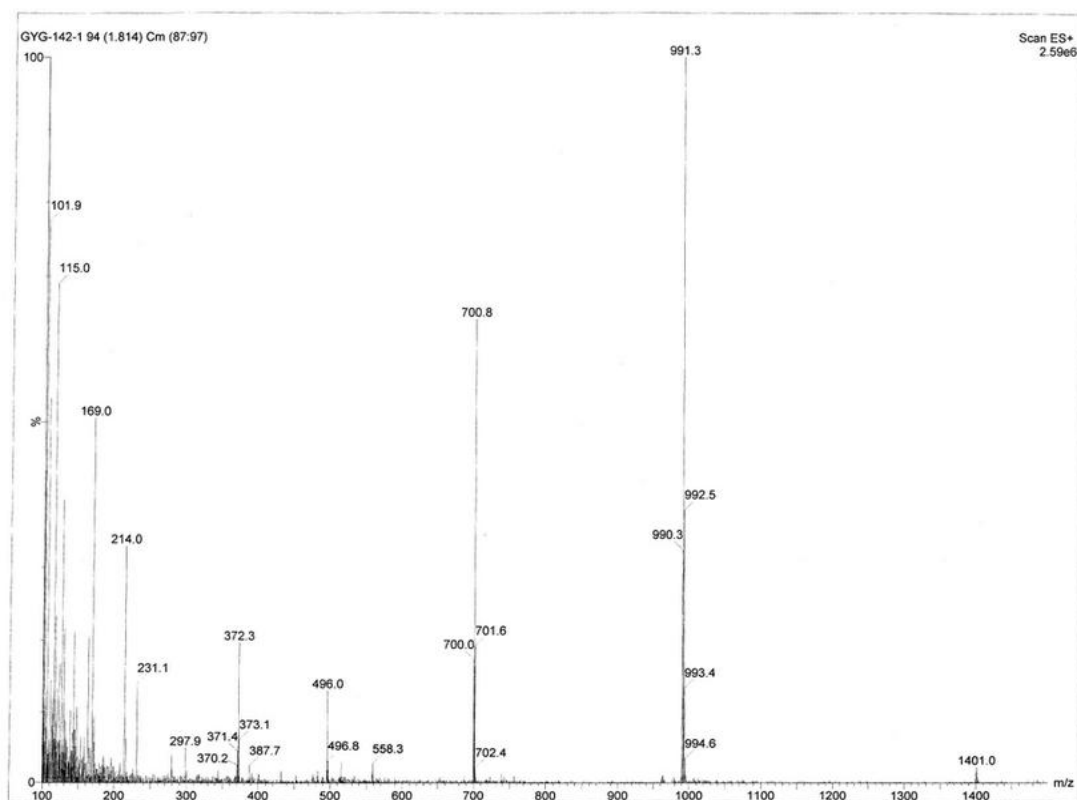

Ms spectrum of compound **7e** (solvent: CDCl<sub>3</sub>)

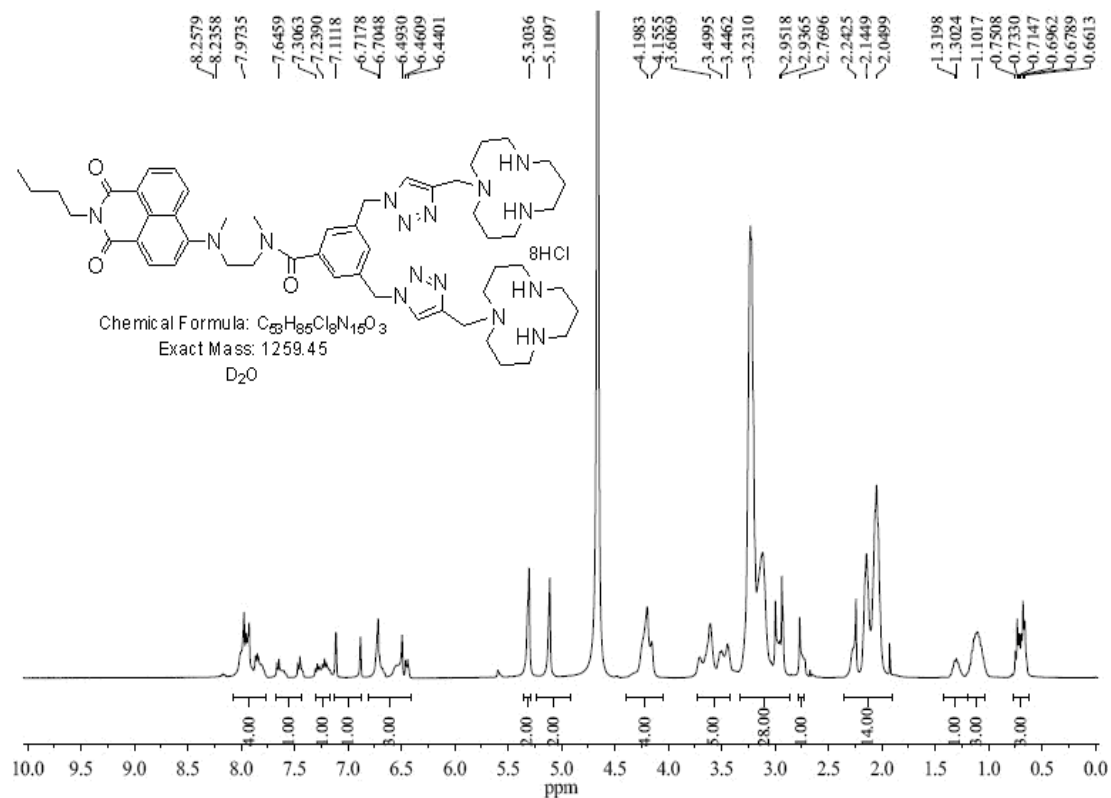

<sup>1</sup>H NMR spectrum of compound 1a (solvent: D<sub>2</sub>O)

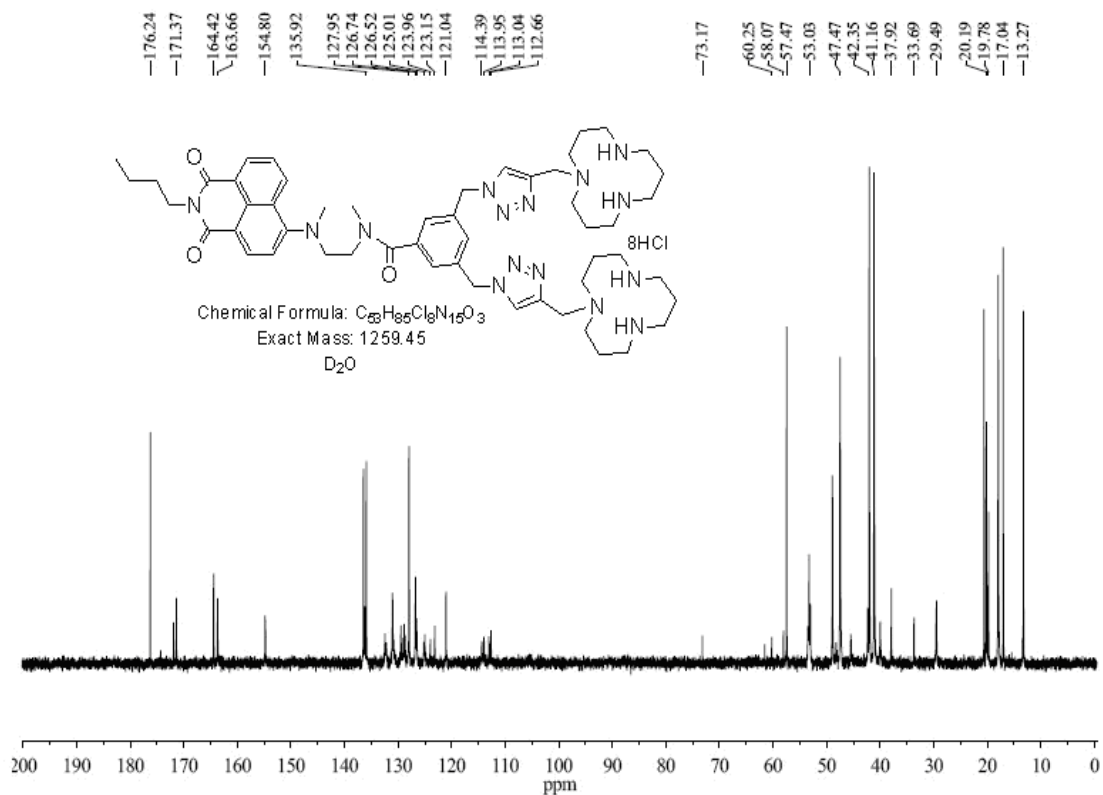

<sup>13</sup>C NMR spectrum of compound 1a (solvent: D<sub>2</sub>O)

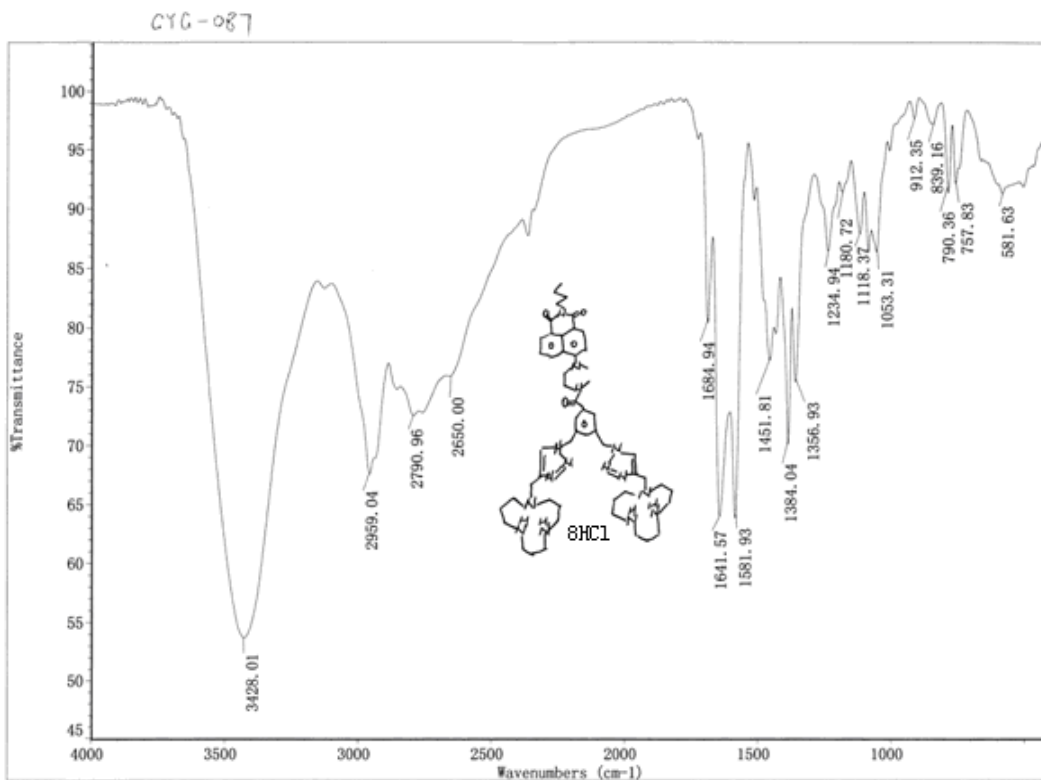

IR spectrum of compound 1a

Elemental Composition Report

Page 1

Single Mass Analysis

Tolerance = 3.0 PPM / DBE: min = -1.5, max = 50.0  
 Element prediction: Off  
 Number of isotope peaks used for i-FIT = 2

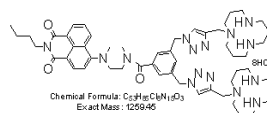

Monoisotopic Mass, Even Electron Ions  
 535 formula(e) evaluated with 2 results within limits (up to 50 closest results for each mass)  
 Elements Used:  
 C: 0-60 H: 0-80 N: 0-15 O: 0-10  
 GYG087 28 (0.518)  
 TOF MS ES+

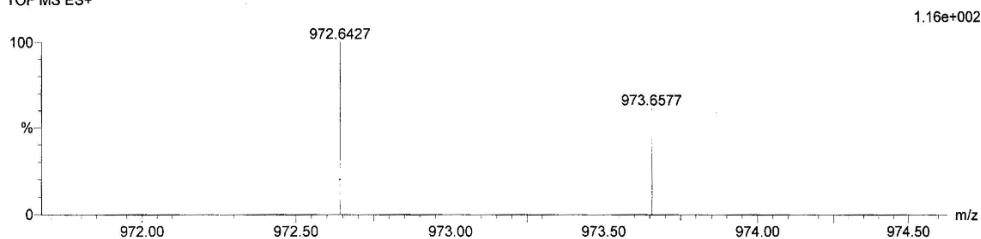

Minimum: -1.5  
 Maximum: 50.0

| Mass     | Calc. Mass | mDa  | PPM  | DBE  | i-FIT | Formula        |
|----------|------------|------|------|------|-------|----------------|
| 972.6427 | 972.6412   | 1.5  | 1.5  | 22.5 | 0.2   | C53 H78 N15 O3 |
|          | 972.6452   | -2.5 | -2.6 | 26.5 | 0.5   | C58 H78 N13 O  |

HRMs spectrum of compound 1a



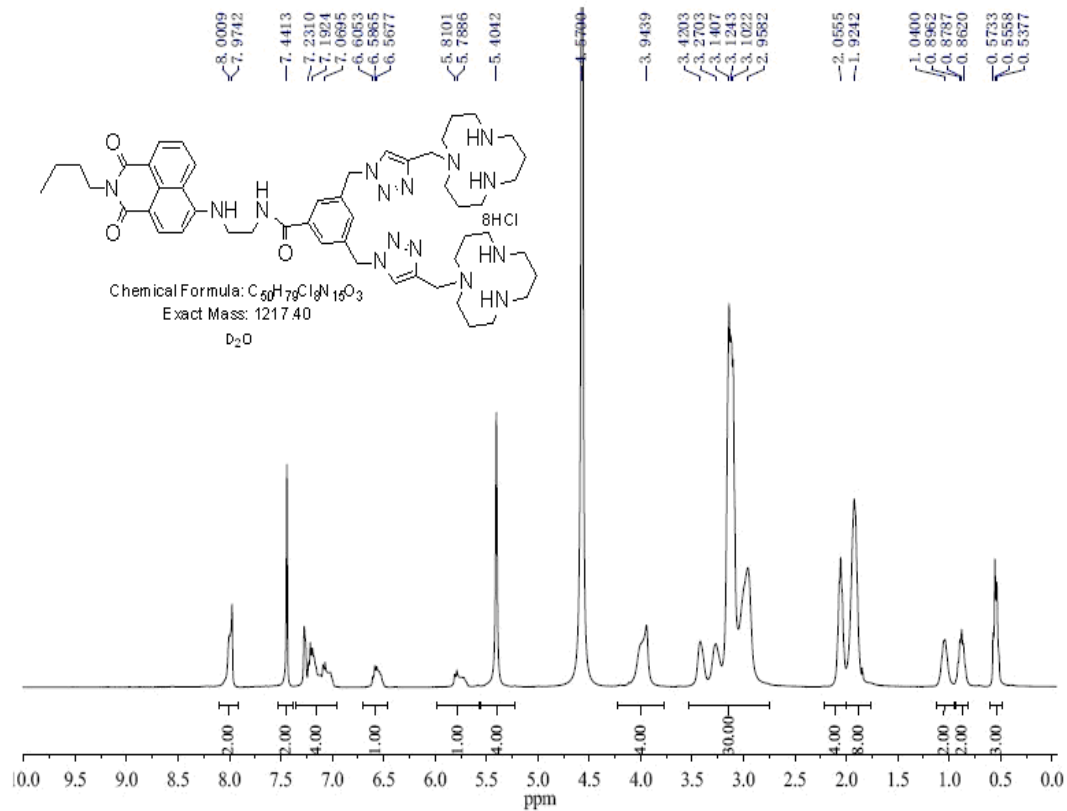

$^1H$  NMR spectrum of compound **1b** (solvent:  $D_2O$ )

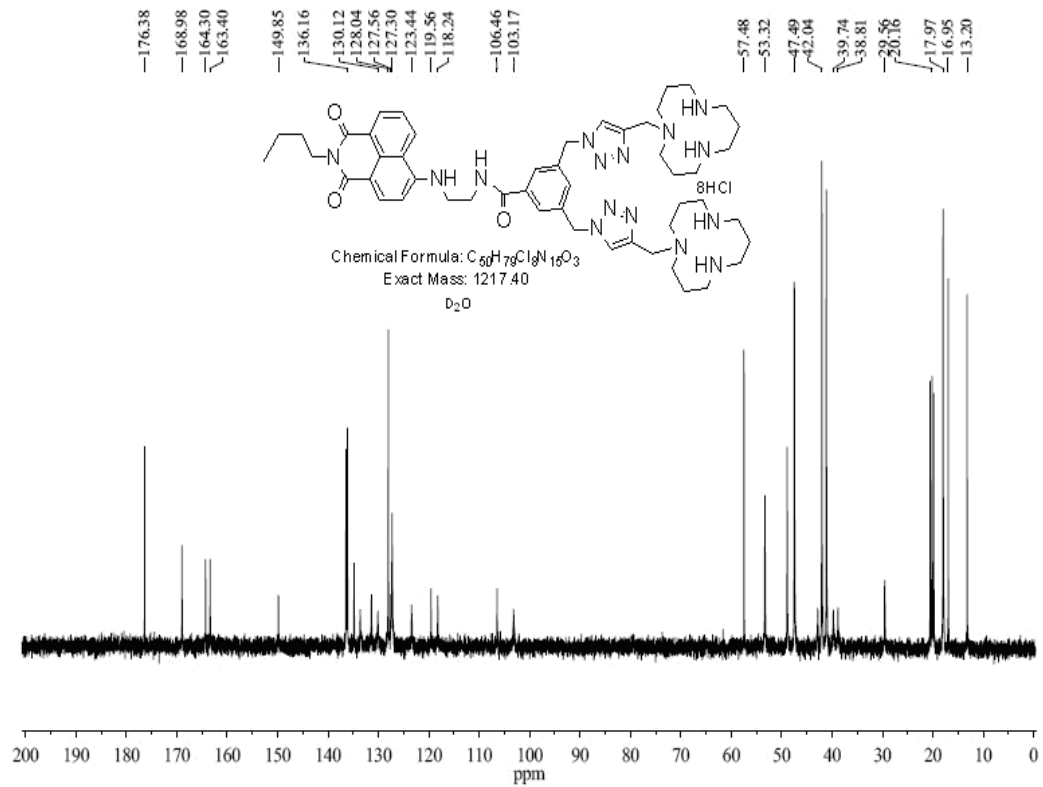

$^{13}C$  NMR spectrum of compound **1b** (solvent:  $D_2O$ )

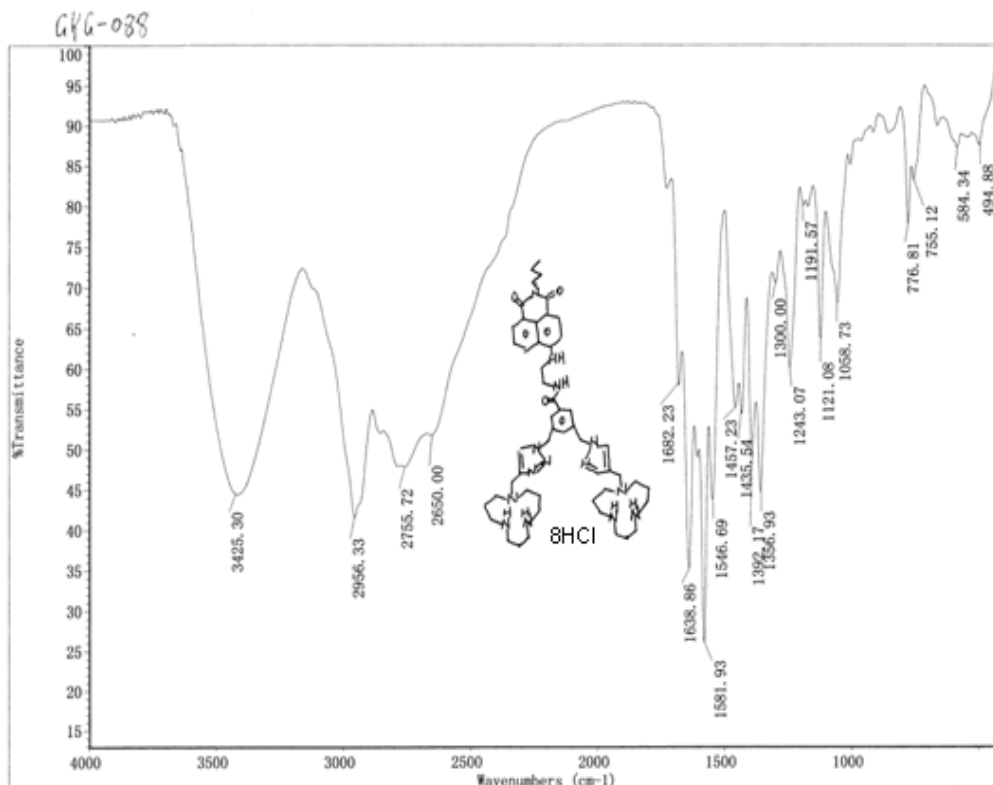

IR spectrum of compound **1b**

Elemental Composition Report

Single Mass Analysis

Tolerance = 5.0 PPM / DBE: min = -1.5, max = 50.0  
 Element prediction: Off  
 Number of isotope peaks used for i-FIT = 2

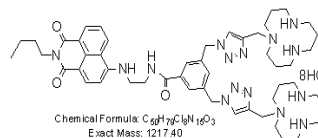

Monoisotopic Mass, Even Electron Ions

671 formula(e) evaluated with 4 results within limits (up to 50 closest results for each mass)

Elements Used:

C: 0-60 H: 0-80 N: 0-15 O: 0-10

GYG088 46 (0.851)

TOF MS ES+

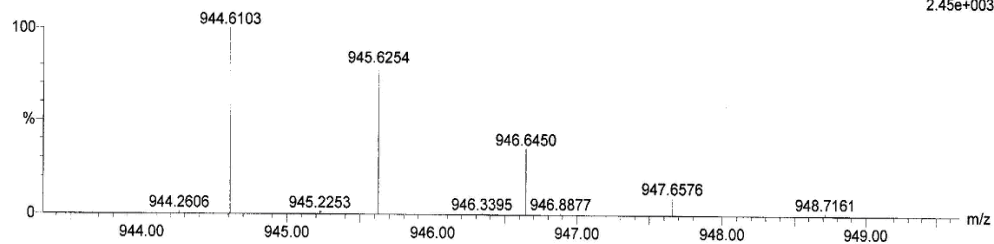

| Mass     | Calc. Mass | mDa  | PPM  | DBE  | i-FIT | Formula        |
|----------|------------|------|------|------|-------|----------------|
| 944.6103 | 944.6099   | 0.4  | 0.4  | 22.5 | 26.7  | C51 H74 N15 O3 |
|          | 944.6086   | 1.7  | 1.8  | 17.5 | 36.0  | C50 H78 N11 O7 |
|          | 944.6126   | -2.3 | -2.4 | 21.5 | 18.7  | C55 H78 N9 O5  |
|          | 944.6139   | -3.6 | -3.8 | 26.5 | 12.5  | C56 H74 N13 O  |

HRMs spectrum of compound **1b**

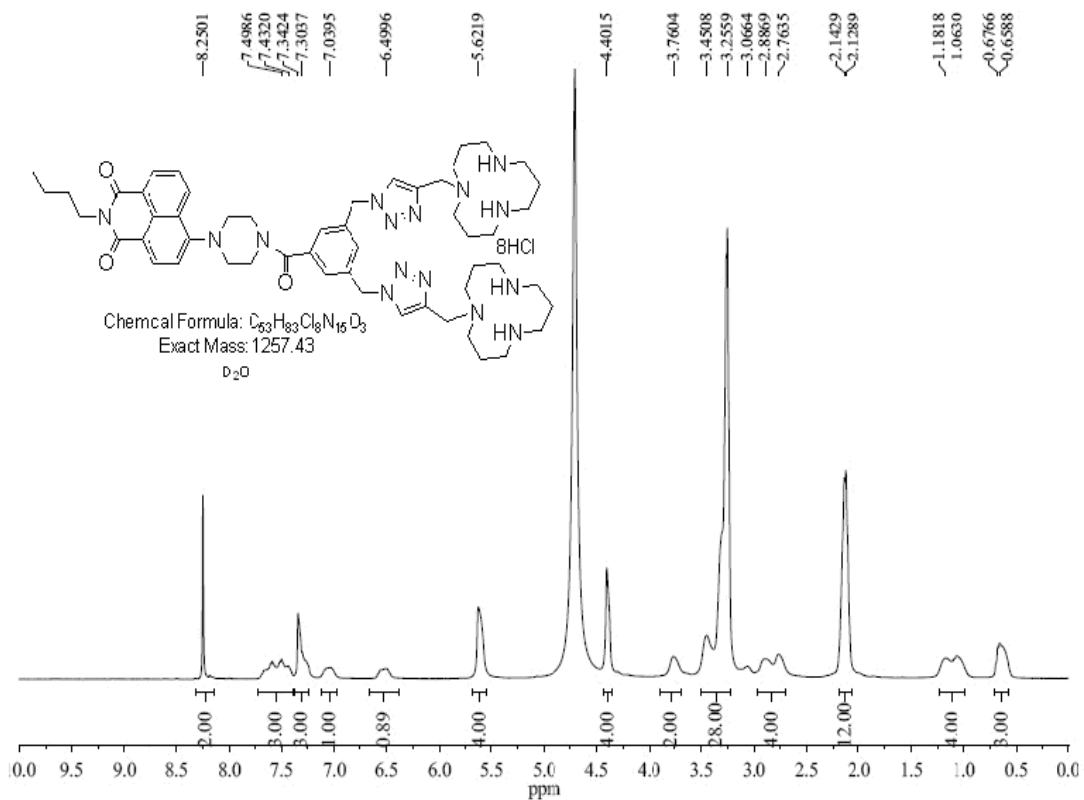

$^1H$  NMR spectrum of compound **1c** (solvent:  $D_2O$ )

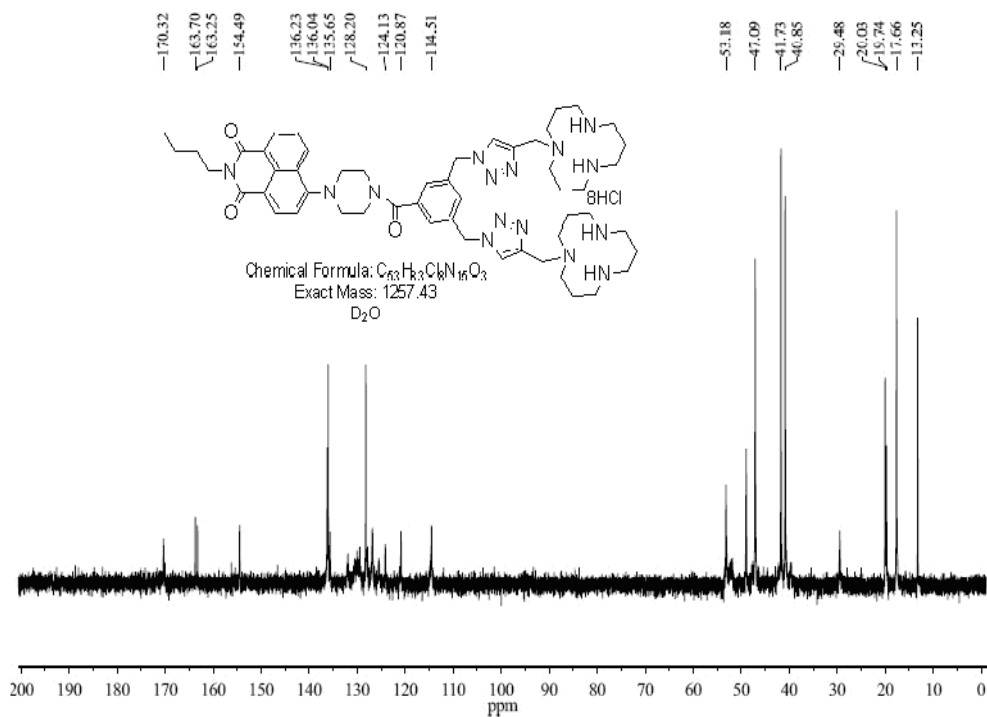

$^{13}C$  NMR spectrum of compound **1c** (solvent:  $D_2O$ )

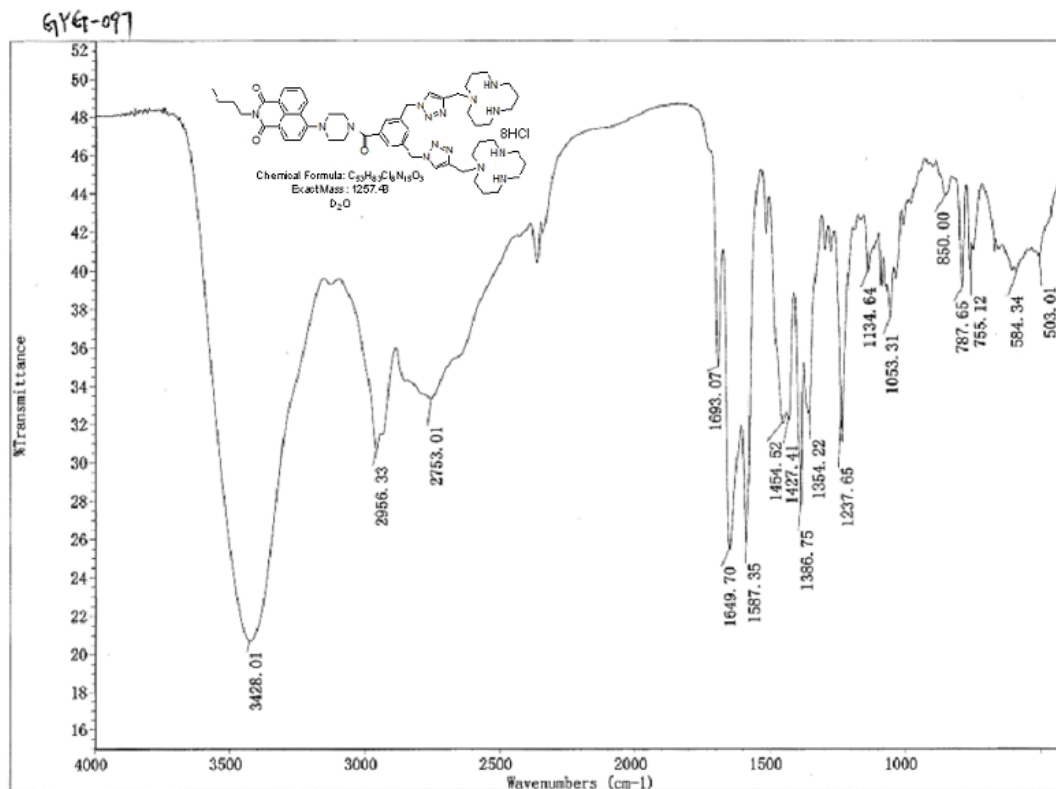

IR spectrum of compound 1c

Elemental Composition Report

Page 1

Single Mass Analysis

Tolerance = 5.0 PPM / DBE: min = -1.5, max = 50.0  
Element prediction: Off  
Number of isotope peaks used for i-FIT = 2

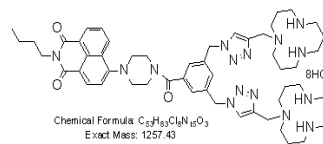

Monoisotopic Mass, Even Electron Ions  
546 formula(e) evaluated with 4 results within limits (up to 50 closest results for each mass)  
Elements Used:  
C: 0-60 H: 0-80 N: 0-15 O: 0-10  
GYG097 12 (0.222)  
TOF MS ES+

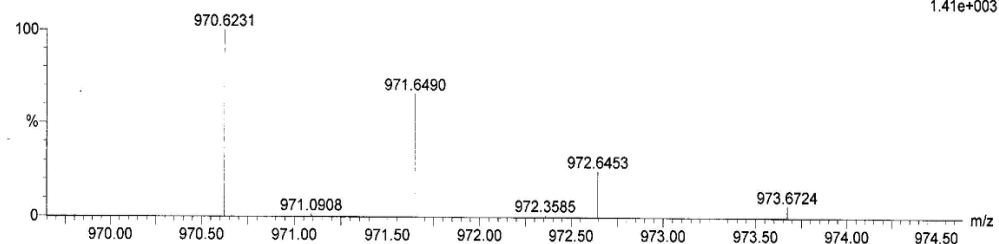

Minimum: -1.5  
Maximum: 50.0

| Mass     | Calc. Mass | mDa  | PPM  | DBE  | i-FIT | Formula        |
|----------|------------|------|------|------|-------|----------------|
| 970.6231 | 970.6242   | -1.1 | -1.1 | 18.5 | 1.6   | C52 H80 N11 O7 |
|          | 970.6256   | -2.5 | -2.6 | 23.5 | 1.2   | C53 H76 N15 O3 |
|          | 970.6202   | 2.9  | 3.0  | 14.5 | 5.3   | C47 H80 N13 O9 |
|          | 970.6183   | 4.8  | 4.9  | 27.5 | 3.9   | C59 H76 N11 O2 |

HRMs spectrum of compound 1c

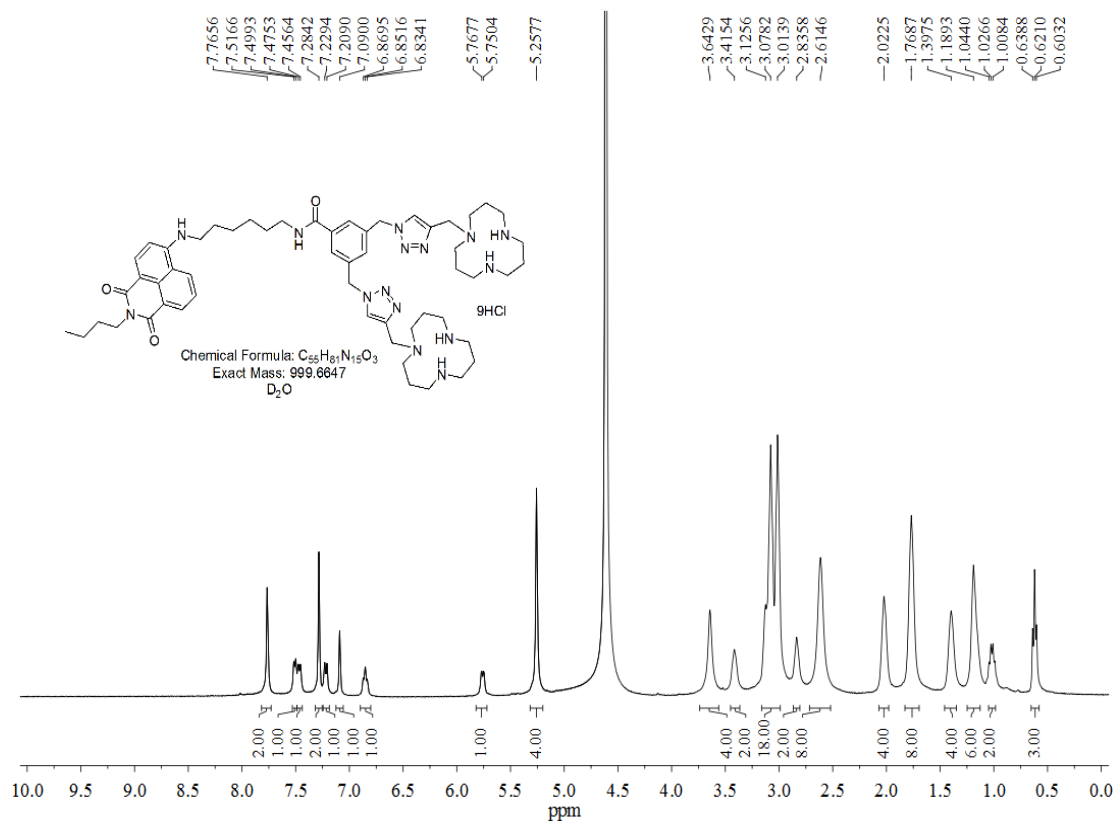

<sup>1</sup>H NMR spectrum of compound **1d** (solvent: D<sub>2</sub>O)

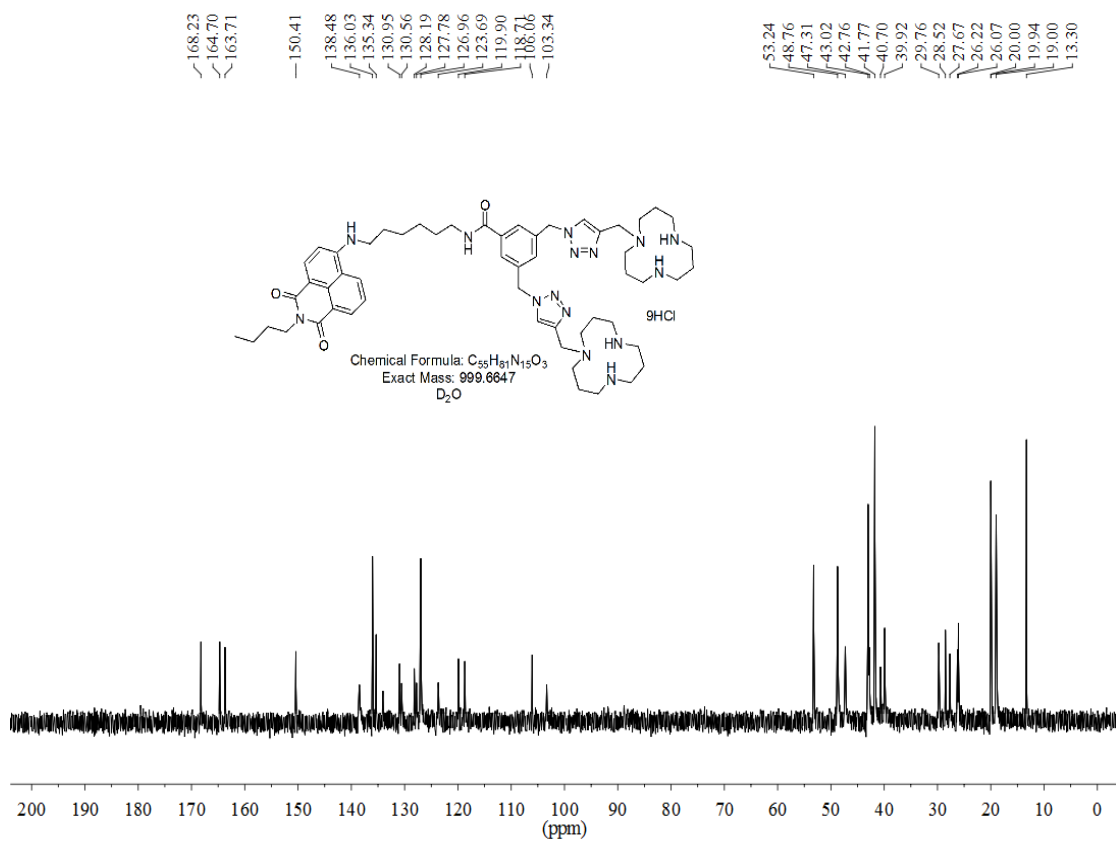

<sup>13</sup>C NMR spectrum of compound **1d** (solvent: D<sub>2</sub>O)

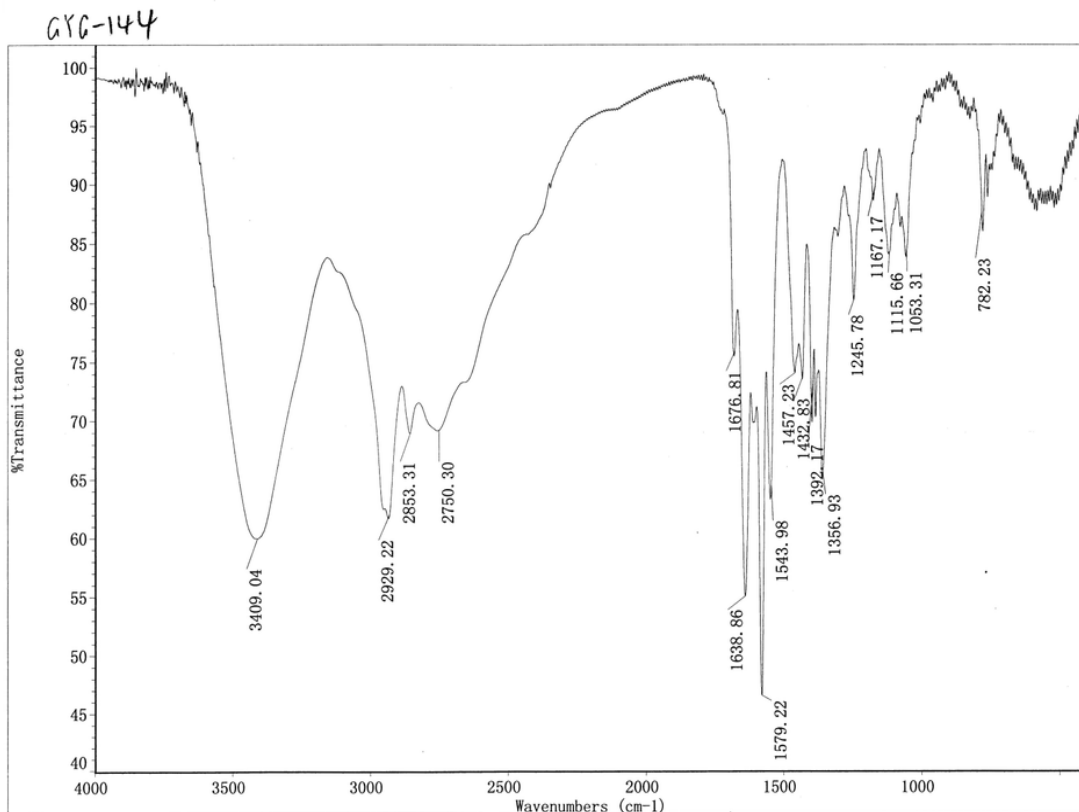

IR spectrum of compound 1d

Elemental Composition Report

Single Mass Analysis

Tolerance = 5.0 PPM / DBE: min = -1.5, max = 50.0  
 Element prediction: Off  
 Number of isotope peaks used for i-FIT = 2

Monoisotopic Mass, Even Electron Ions

6941 formula(e) evaluated with 27 results within limits (up to 50 closest results for each mass)

Elements Used:

C: 0-100 H: 0-120 N: 0-15 O: 0-10 I: 0-4

GYG-144 11 (0.204)

TOF MS ES+

1.83e+003

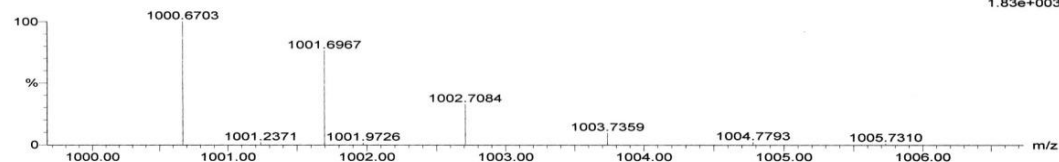

Minimum:  
Maximum:

5.0 5.0 -1.5  
5.0 50.0

| Mass      | Calc. Mass | mDa  | PPM  | DBE  | i-FIT | Formula           |
|-----------|------------|------|------|------|-------|-------------------|
| 1000.6703 | 1000.6704  | -0.1 | -0.1 | 10.5 | 14.2  | C53 H95 N9 O I    |
|           | 1000.6712  | -0.9 | -0.9 | 17.5 | 10.4  | C54 H86 N11 O7 I  |
|           | 1000.6712  | -0.9 | -0.9 | 21.5 | 239.2 | C24 H9 N6 O7 I4   |
|           | 1000.6693  | 1.0  | 1.0  | 34.5 | 119.4 | C36 H5 N4 I4      |
|           | 1000.6693  | 1.0  | 1.0  | 30.5 | 2.5   | C66 H82 N9        |
|           | 1000.6691  | 1.2  | 1.2  | 5.5  | 19.9  | C52 H99 N5 O5 I   |
|           | 1000.6687  | 1.6  | 1.6  | 36.5 | 122.8 | C36 N2 O10 I3     |
|           | 1000.6720  | -1.7 | -1.7 | 29.5 | 2.9   | C70 H86 N3 O2     |
|           | 1000.6685  | 1.8  | 1.8  | 22.5 | 268.8 | C20 H5 N12 O5 I4  |
|           | 1000.6725  | -2.2 | -2.2 | 22.5 | 6.7   | C55 H82 N15 O3    |
|           | 1000.6725  | -2.2 | -2.2 | 26.5 | 212.1 | C25 H5 N10 O3 I4  |
|           | 1000.6680  | 2.3  | 2.3  | 25.5 | 2.5   | C65 H86 N5 O4     |
|           | 1000.6680  | 2.3  | 2.3  | 29.5 | 139.0 | C35 H9 O4 I4      |
|           | 1000.6727  | -2.4 | -2.4 | 40.5 | 87.8  | C41 O8 I3         |
|           | 1000.6678  | 2.5  | 2.5  | 0.5  | 26.9  | C51 H103 N O9 I   |
|           | 1000.6731  | -2.8 | -2.8 | 9.5  | 9.4   | C57 H99 N3 O3 I   |
|           | 1000.6672  | 3.1  | 3.1  | 17.5 | 299.5 | C19 H9 N8 O9 I4   |
|           | 1000.6671  | 3.2  | 3.2  | 13.5 | 21.6  | C49 H86 N13 O9    |
|           | 1000.6736  | -3.3 | -3.3 | 2.5  | 45.2  | C42 H95 N15 O4 I  |
|           | 1000.6739  | -3.6 | -3.6 | 16.5 | 6.5   | C58 H90 N5 O9     |
|           | 1000.6739  | -3.6 | -3.6 | 20.5 | 211.6 | C28 H13 O9 I4     |
|           | 1000.6666  | 3.7  | 3.7  | 20.5 | 3.4   | C64 H90 N O8      |
|           | 1000.6664  | 3.9  | 3.9  | 6.5  | 27.3  | C48 H95 N11 O3 I  |
|           | 1000.6744  | -4.1 | -4.1 | 13.5 | 371.0 | C13 H9 N12 O10 I4 |
|           | 1000.6752  | -4.9 | -4.9 | 21.5 | 3.8   | C59 H86 N9 O5     |
|           | 1000.6752  | -4.9 | -4.9 | 25.5 | 186.4 | C29 H9 N4 O5 I4   |
|           | 1000.6653  | 5.0  | 5.0  | 30.5 | 161.1 | C31 H5 N6 O2 I4   |

HRMs spectrum of compound 1d

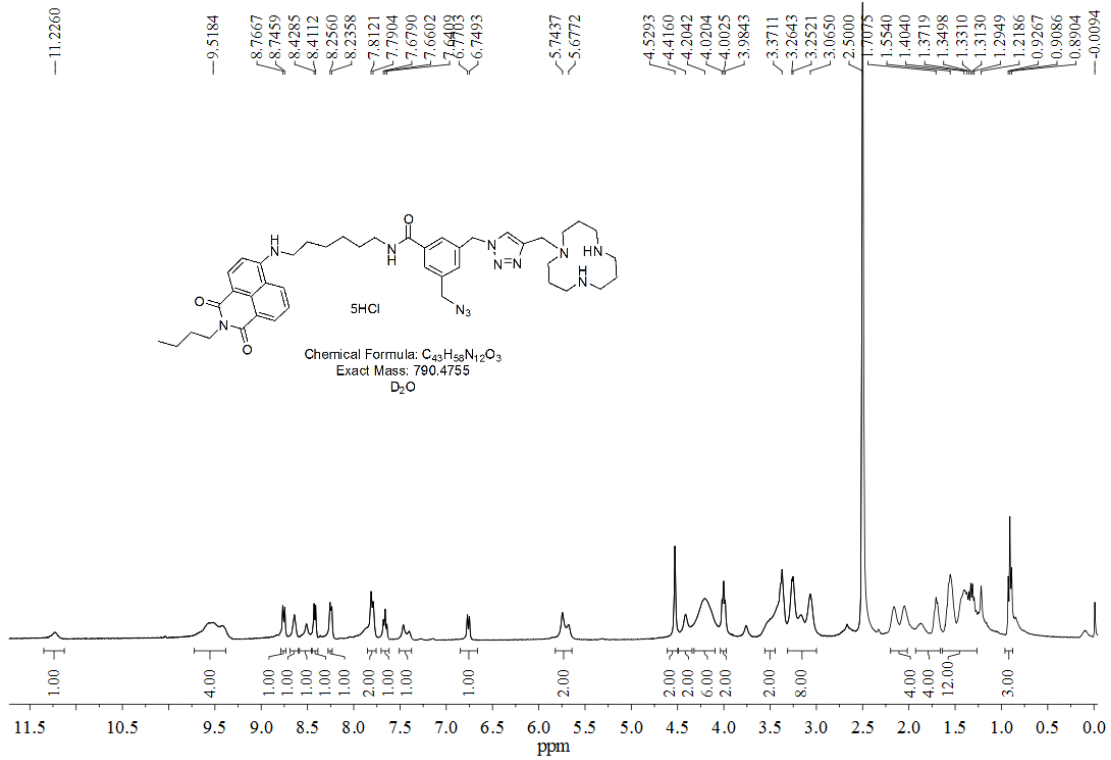

<sup>1</sup>H NMR spectrum of compound **1e** (solvent: D<sub>2</sub>O)

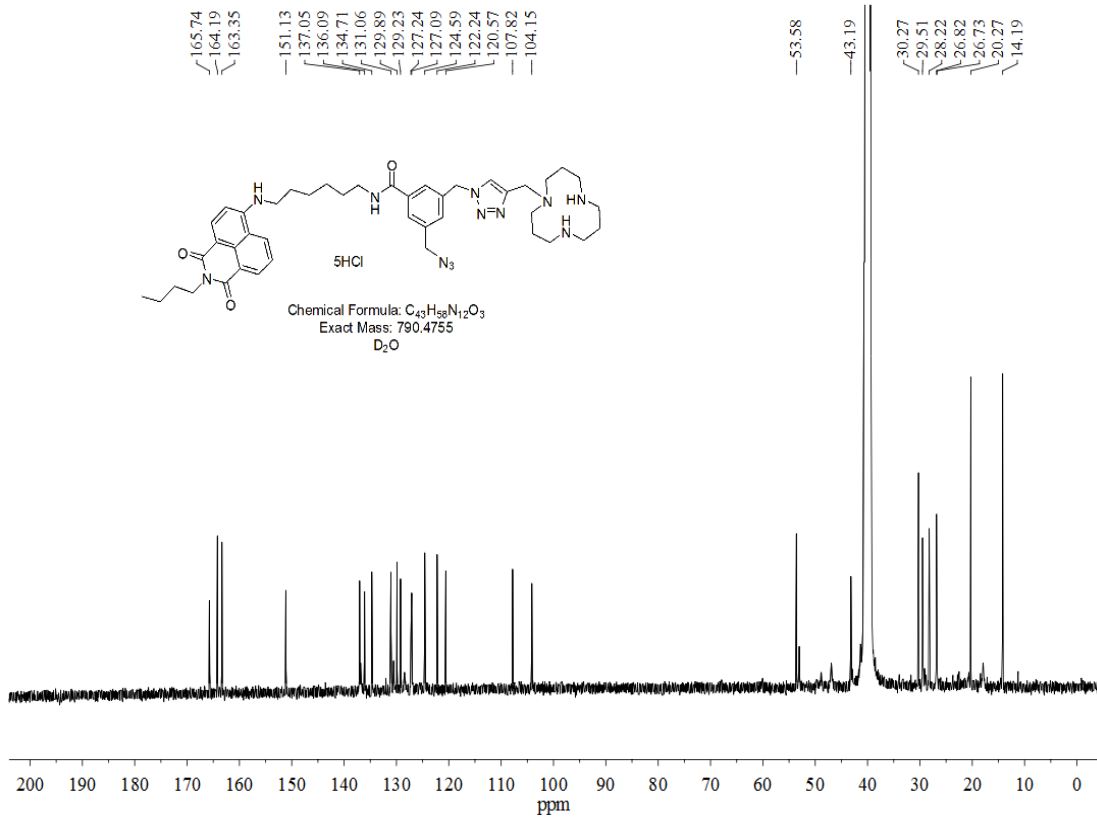

<sup>13</sup>C NMR spectrum of compound **1e** (solvent: D<sub>2</sub>O)

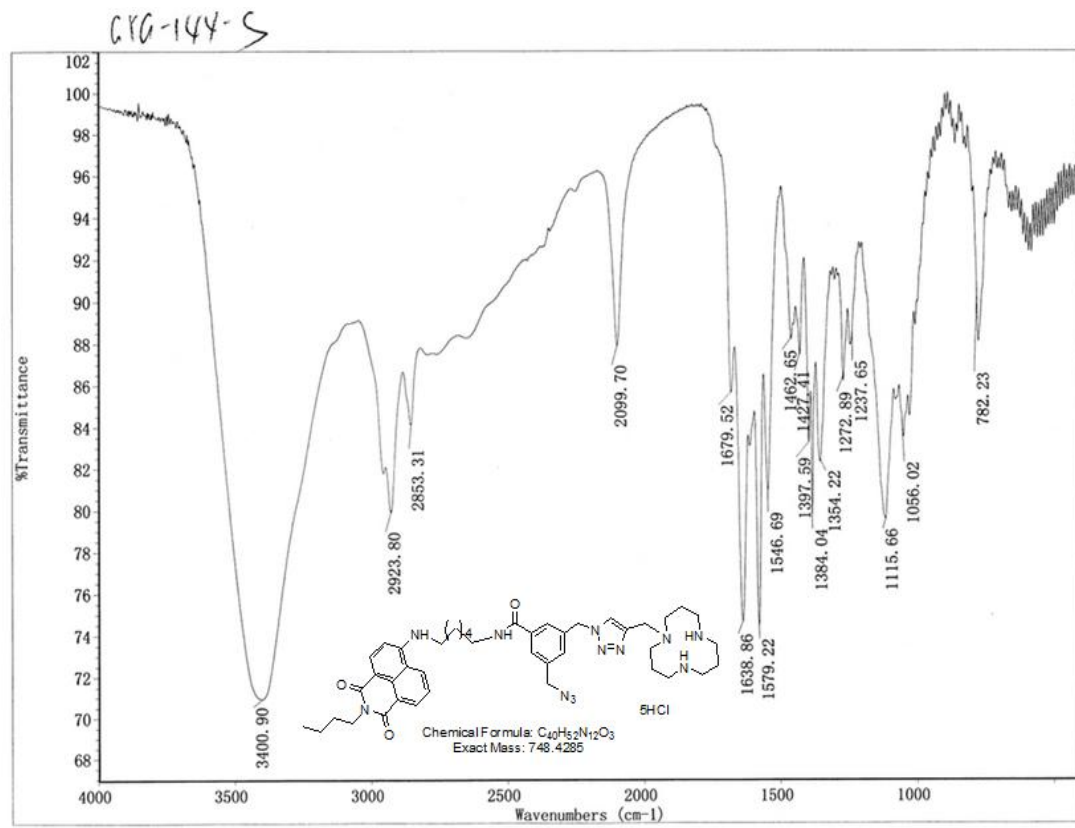

IR spectrum of compound **1e**

Elemental Composition Report

Page 1

Single Mass Analysis

Tolerance = 5.0 PPM / DBE: min = -1.5, max = 50.0  
Element prediction: Off  
Number of isotope peaks used for i-FIT = 2

Monoisotopic Mass, Even Electron Ions

4915 formula(e) evaluated with 11 results within limits (up to 50 closest results for each mass)

Elements Used:

C: 0-100 H: 0-120 N: 0-15 O: 0-10 I: 0-4

GYG-144S 25 (0.462)

TOF MS ES+

1.20e+003

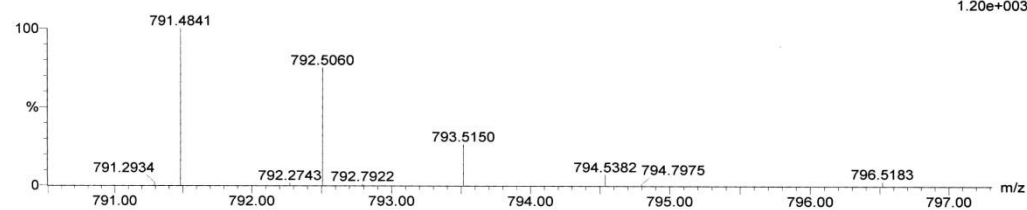

Minimum:

Maximum:

| Mass     | Calc. Mass | mDa  | PPM  | DBE  | i-FIT | Formula          |
|----------|------------|------|------|------|-------|------------------|
| 791.4841 | 791.4839   | 0.2  | 0.3  | 7.5  | 34.4  | C45 H76 O3 I     |
|          | 791.4844   | -0.3 | -0.4 | 0.5  | 87.1  | C30 H72 N12 O4 I |
|          | 791.4847   | -0.6 | -0.8 | 14.5 | 28.6  | C46 H67 N2 O9    |
|          | 791.4833   | 0.8  | 1.0  | 20.5 | 28.9  | C43 H59 N12 O3   |
|          | 791.4852   | -1.1 | -1.4 | 7.5  | 76.8  | C31 H63 N14 O10  |
|          | 791.4828   | 1.3  | 1.6  | 27.5 | 6.1   | C58 H63 O2       |
|          | 791.4860   | -1.9 | -2.4 | 19.5 | 22.3  | C47 H63 N6 O5    |
|          | 791.4820   | 2.1  | 2.7  | 15.5 | 36.2  | C42 H63 N8 O7    |
|          | 791.4812   | 2.9  | 3.7  | 8.5  | 42.9  | C41 H72 N6 O I   |
|          | 791.4871   | -3.0 | -3.8 | -0.5 | 74.3  | C34 H76 N6 O6 I  |
|          | 791.4873   | -3.2 | -4.0 | 24.5 | 16.9  | C48 H59 N10 O    |

HRMs spectrum of compound **1e**
